# Supplementary material for: The importance of freshwater systems to the net exchange of atmospheric carbon dioxide and methane with rapidly changing high Arctic landscapes
Source: Copernicus journal article supplement (doi:10.5194/bg-2016-79), 2016-03-14
Supplement: Supplementary file 1 [file bg-2016-79-supplement.pdf]

# **The importance of freshwater systems to the net exchange of atmospheric carbon dioxide and methane with rapidly changing high Arctic landscapes**

*Craig A. Emmerton, Vincent L. St. Louis, Igor Lehnherr, Jennifer A. Graydon, Jane L. Kirk, Kimberly J. Rondeau*

## **Supporting Information**

### **Numerical analysis**

We used hierarchical clustering analysis (IBM SPSS Statistics 23) to organize ponds and lakes into similar categories based on concurrent greenhouse gases and chemistry analyses (10 sites; n=62). We used between-group linkage and squared Euclidean distances to group similar sites together and delineate distinct high Arctic freshwater types. We then used linear-mixed models (SPSS) to quantify differences in greenhouse gases concentrations and fluxes between different high Arctic freshwater types. Linear-mixed models are ideal for analysing non-independent, repeated measures data as they integrate inherent errors in repeated sampling designs to more clearly distinguish statistical differences between groups. Linear mixed model details included: use of an auto-regressive moving average (1,1) repeated covariance model; use of a Maximum Likelihood estimation method; and variables organized by freshwater type (fixed) and year (random).

### **Bottle – Automated system dissolved CO<sub>2</sub> concentration comparison**

Though bottle (time-series) and automated system (diurnal) dissolved CO<sub>2</sub> concentrations were not directly compared in this study, the concentrations measured in Pond 01 and Skeleton Lake using each approach were near identical in most cases (Figure S1). In 2008 (Skeleton Lake) and 2009 (Pond 01), however, calibration of the automated systems appeared to have shifted during transit, causing a slight step difference in measured CO<sub>2</sub> concentrations between the two approaches.

### **Ebullition fluxes**

Ebullition can also liberate CO<sub>2</sub> and CH<sub>4</sub> from freshwater systems. We used submerged inverted 30-cm plastic funnels with a bubble collection chamber to quantify ebullition fluxes of CO<sub>2</sub> and CH<sub>4</sub> from the surface of Skeleton Lake and Pond 01. Traps were deployed continuously at both sites during the 2007 and 2008 summers and checked weekly for bubble volume accumulation. Ebullition volume was measured by drawing into a syringe, through a rubber septum in the collection chamber, the accumulated gas. However, we did not measure gas concentrations of this trapped gas because CO<sub>2</sub> and CH<sub>4</sub> can diffuse back into surface waters while sitting in the trap. Instead, fresh bubbles were collected for CO<sub>2</sub> and CH<sub>4</sub> analyses by probing the sediments and collecting them into a hand held bubble trap. Samples were then immediately transferred to evacuated, stoppered 30 ml Wheaton bottles and analyzed for CO<sub>2</sub> and CH<sub>4</sub> concentrations on the GC in a manner similar to that described in the main manuscript for water samples. Bubble CO<sub>2</sub> and CH<sub>4</sub> concentrations were multiplied by bubble volume collected over the weeklong period to determine ebullition fluxes.

39 **Tables**

40 **Table S1:** Mean weather conditions measured by a polar semidesert eddy  
 41 covariance/meteorological station about 1 km from base camp during the growing season  
 42 between 2008 and 2012 in the Lake Hazen watershed.

| Month  | Air temp. (°C) | Rainfall (mm) | Wind speed (kph) | PAR ( $\mu\text{mol m}^{-2} \text{s}^{-1}$ ) | Air pressure (kPa) | Soil moisture ( $\text{m}^3 \text{m}^{-3}$ ) | Soil temp. (°C) |
|--------|----------------|---------------|------------------|----------------------------------------------|--------------------|----------------------------------------------|-----------------|
| June   | 5.0            | 3.8           | 2.9              | 699                                          | 99.4               | 0.16                                         | 6.9             |
| July   | 8.4            | 19.3          | 2.9              | 596                                          | 98.8               | 0.15                                         | 12.0            |
| August | 5.7            | 10.5          | 2.7              | 384                                          | 98.7               | 0.14                                         | 7.4             |

43 **Table S2** Sampling years and dates for greenhouse gases concentrations collected using bottles  
 44 (B) or automated systems (AS), and general chemical analyses (C) of several freshwater systems  
 45 throughout the Lake Hazen watershed.

| Water body           |    | 2005   | 2007      | 2008     | 2009      | 2010      | 2011     | 2012     |
|----------------------|----|--------|-----------|----------|-----------|-----------|----------|----------|
| Pond 01              | B  | 6-21/7 | 24/6-21/7 | 6/7-4/8  | 29/6-22/7 | 16/6-20/7 | 6/7-30/7 | -        |
|                      | AS | -      | 24/6-21/7 | 10/7-2/8 | 29/6-21/7 | 19/6-5/7  | -        | -        |
|                      | C  | 6-23/7 | 28/6-18/7 | 9/7-2/8  | 2-22/7    | 28/6-20/7 | -        | -        |
| Pond 02              | B  | 6-21/7 | 8/7       | 9/7-2/8  | -         | 10-20/7   | 6/7-30/7 | -        |
|                      | C  | 6-22/7 | 6/7       | 9/7-2/8  | -         | 10-20/7   | -        | -        |
| Pond 03              | B  | 10/7   | 13-14/7   | 29/7     | -         | 12-17/7   | 6/7-30/7 | -        |
|                      | C  | -      | 14/7      | -        | -         | 12-17/7   | -        | -        |
| Pond 07              | B  | 15/7   | 9/7       | 29/7     | -         | 13-18/7   | 6/7-30/7 | -        |
|                      | C  | -      | 10/7      | -        | -         | 13-18/7   | -        | -        |
| Pond 10              | B  | 15/7   | -         | -        | -         | 13-18/7   | 6/7-30/7 | -        |
|                      | C  | -      | -         | -        | -         | 13-18/7   | -        | -        |
| Pond 11              | B  | 15/7   | -         | -        | -         | 12-17/7   | 4/7-30/7 | 4/7-31/7 |
|                      | C  | -      | -         | -        | -         | 12-17/7   | -        | 31/7     |
| Pond 12              | B  | 15/7   | 14-16/7   | 29/7     | -         | 12-17/7   | -        | -        |
|                      | C  | -      | 14/7      | -        | -         | 12-17/7   | -        | -        |
| Pond 16              | B  | -      | -         | -        | -         | 13-18/7   | 6/7-30/7 | -        |
|                      | C  | -      | -         | -        | -         | 13-18/7   | -        | -        |
| Skeleton Lake        | B  | -      | 25/6-19/7 | 6/7-3/8  | 29/6-22/7 | 18/6-19/7 | 4/7-30/7 | 4/7-31/7 |
|                      | AS | -      | -         | 8/7-3/8  | 1-21/7    | 25/6-20/7 | -        | -        |
|                      | C  | -      | 14/7      | 10/7-2/8 | 2-22/7    | 28/6-17/7 | -        | -        |
| Lake Hazen shoreline | B  | 4-20/7 | 24/6-21/7 | 6/7-4/8  | 29/6-22/7 | 22/6-20/7 | 6/7-30/7 | -        |
|                      | C  | 6-13/7 | -         | 10/7-3/8 | 2-22/7    | 28/6-20/7 | -        | -        |

46 **Table S3** Empirical relationships for  $k$  ( $\text{cm hr}^{-1}$ ; Hamilton *et al.*, 1994) used in the mass flux  
47 equation for greenhouse gases samples (Equation 1 in the manuscript).

$$\begin{aligned} \text{if } U < 3 \text{ m s}^{-1}: & & k_{600} &= 0.76U \\ & & k_{\text{CO}_2} &= k_{600} * (600^{0.67}/\text{SC}_{\text{CO}_2}^{0.67}) \\ & & k_{\text{CH}_4} &= k_{600} * (600^{0.67}/\text{SC}_{\text{CO}_2}^{0.67}) \end{aligned}$$

$$\begin{aligned} \text{if } U \geq 3 \text{ m s}^{-1}: & & k_{600} &= 5.6U - 14.14 \\ & & k_{\text{CO}_2} &= k_{600} * (600^{0.50}/\text{SC}_{\text{CO}_2}^{0.50}) \\ & & k_{\text{CH}_4} &= k_{600} * (600^{0.50}/\text{SC}_{\text{CO}_2}^{0.50}) \end{aligned}$$

48 *Notes: U is in-situ wind speed ( $\text{m s}^{-1}$ ) measured at 1 m on automated systems or at a nearby meteorological station;*  
49  *$k_{600}$  ( $\text{cm hr}^{-1}$ ) is the exchange coefficient*

50 **Table S4** Pearson correlation coefficients of greenhouse gases and general chemistry of  
 51 freshwater types in the Lake Hazen watershed during the growing seasons of 2005, 2007-2012.  
 52 Statistical significance at  $\alpha=0.05$  indicated in **bold** (IBM SPSS Statistics 23).

|                                                            | CO <sub>2</sub> |                |               |               | CH <sub>4</sub> |                |               |              |
|------------------------------------------------------------|-----------------|----------------|---------------|---------------|-----------------|----------------|---------------|--------------|
|                                                            | Evap.           | Melt.          | Shore.        | LH Shore      | Evap.           | Melt.          | Shore.        | LH Shore     |
| Air <sub>P</sub>                                           | .542            | .050           | .350          | <b>-.565*</b> | <b>-.803*</b>   | .097           | .144          | -.429        |
| Water <sub>T</sub>                                         | .131            | -.409          | .397          | -.308         | .258            | <b>-.483*</b>  | .266          | .187         |
| CO <sub>2</sub>                                            | 1               | 1              | 1             | 1             | -.526           | <b>.630**</b>  | <b>.530*</b>  | .418         |
| CH <sub>4</sub>                                            | -.526           | <b>.630**</b>  | <b>.530*</b>  | .418          | 1               | 1              | 1             | 1            |
| W <sub>S</sub>                                             | -.048           | -.066          | -.063         | <b>.624*</b>  | -.329           | -.289          | .287          | -.276        |
| DIC                                                        | .720            | .005           | <b>.818**</b> | <b>.694**</b> | -.724           | <b>-.567*</b>  | .387          | .291         |
| NH <sub>4</sub> <sup>+</sup>                               | .453            | .139           | <b>.783**</b> | -.255         | -.536           | -.183          | .409          | -.142        |
| NO <sub>3</sub> <sup>-</sup> +NO <sub>2</sub> <sup>-</sup> | -.314           | -.003          | .345          | <b>.689**</b> | <b>.884**</b>   | -.120          | <b>.661**</b> | .158         |
| TDN                                                        | .285            | <b>-.576*</b>  | <b>.692**</b> | .351          | -.341           | <b>-.527*</b>  | <b>.579**</b> | .335         |
| DON                                                        | .278            | -.467          | <b>.600**</b> | .297          | -.333           | -.235          | <b>.554**</b> | .236         |
| PN                                                         | -.071           | -.093          | .387          | .475          | -.001           | -.346          | -.192         | .403         |
| TP                                                         | .597            | -.132          | .033          | .346          | -.211           | .175           | -.117         | -.118        |
| TDP                                                        | <b>.794*</b>    | .014           | <b>.539**</b> | <b>.616*</b>  | -.285           | .251           | .397          | -.025        |
| PC                                                         | .669            | -.141          | .359          | <b>.526*</b>  | -.743           | -.401          | -.146         | <b>.613*</b> |
| DOC                                                        | <b>.913**</b>   | <b>-.670**</b> | <b>.462*</b>  | -.510         | -.622           | <b>-.552*</b>  | .396          | -.034        |
| Cl <sup>-</sup>                                            | .227            | .044           | <b>.458*</b>  | <b>.641*</b>  | -.680           | -.303          | .329          | .149         |
| SO <sub>4</sub> <sup>2-</sup>                              | .154            | <b>-.582*</b>  | -.291         | <b>.668**</b> | .004            | <b>-.706**</b> | -.027         | .282         |
| Na <sup>+</sup>                                            | -.315           | <b>-.481*</b>  | <b>.654**</b> | <b>.715**</b> | -.376           | <b>-.573*</b>  | <b>.474*</b>  | .331         |
| K <sup>+</sup>                                             | .156            | .147           | <b>.793**</b> | <b>.712**</b> | -.644           | -.215          | <b>.467*</b>  | .416         |
| Ca <sup>2+</sup>                                           | .561            | -.340          | <b>.587**</b> | <b>.703**</b> | -.014           | <b>-.824**</b> | .282          | .200         |
| Mg <sup>2+</sup>                                           | .349            | -.364          | .327          | <b>.718**</b> | -.478           | <b>-.751**</b> | <b>.448*</b>  | .380         |
| Fe                                                         | <b>.974**</b>   | <b>-.575*</b>  | <b>.741**</b> | --            | -.483           | -.029          | .278          | --           |
| Alkalinity                                                 | .746            | -.015          | <b>.818**</b> | <b>.697**</b> | <b>-.755*</b>   | <b>-.592**</b> | <b>.487*</b>  | .266         |
| HCO <sub>3</sub> <sup>-</sup>                              | <b>.783*</b>    | -.015          | <b>.818**</b> | <b>.698**</b> | -.744           | <b>-.591**</b> | <b>.487*</b>  | .266         |
| CO <sub>3</sub> <sup>2-</sup>                              | -.472           | --             | --            | --            | -.287           | --             | --            | --           |
| TDS                                                        | .436            | -.150          | <b>.439*</b>  | -.230         | -.251           | -.383          | .360          | .011         |
| Chl-a                                                      | -.636           | -.317          | .277          | -.068         | .131            | -.251          | -.076         | -.039        |
| pH                                                         | <b>-.854*</b>   | -.392          | -.169         | -.261         | .088            | <b>-.512*</b>  | -.073         | -.175        |

53 Evap.: Evaporative ponds; Melt.: Meltwater systems; Shore.: Shoreline ponds; LH Shore: Lake Hazen Shoreline; Air<sub>P</sub>:  
 54 barometric pressure; Water<sub>T</sub>: water temperature; dCO<sub>2</sub>: dissolved carbon dioxide concentration; dCH<sub>4</sub>: dissolved methane  
 55 concentration; W<sub>S</sub>: wind speed; DIC: dissolved inorganic carbon; NH<sub>4</sub><sup>+</sup>: ammonium; NO<sub>3</sub><sup>-</sup>+NO<sub>2</sub><sup>-</sup>: nitrate + nitrite; TDN: total  
 56 dissolved nitrogen; DON: dissolved organic nitrogen; PN: particulate nitrogen, TP: total phosphorus; TDP: total dissolved  
 57 phosphorus; PC: particulate carbon; DOC: dissolved organic carbon; Cl<sup>-</sup>: chloride; SO<sub>4</sub><sup>2-</sup>: sulphate; Na<sup>+</sup>: sodium; K<sup>+</sup>: potassium;  
 58 Ca<sup>2+</sup>: calcium; Mg<sup>2+</sup>: magnesium; Fe: total iron; HCO<sub>3</sub><sup>2-</sup>: bicarbonate; CO<sub>3</sub><sup>2-</sup>: carbonate; TDS: total dissolved solids; Chl-a:  
 59 chlorophyll-a; pH: log[H<sup>+</sup>]  
 60

61 **Table S5** Freshwater ebullition fluxes of carbon dioxide (CO<sub>2</sub>) and methane (CH<sub>4</sub>) during the  
 62 growing seasons of 2007 and 2008 in Skeleton Lake and Pond 01 in the Lake Hazen watershed.  
 63

| <b>Pond/Lake</b>          | <b>Bubble volume (mL)</b> | <b>CO<sub>2</sub> Bubble concentration (mgCO<sub>2</sub> L<sup>-1</sup>)</b> | <b>CO<sub>2</sub> Bubble flux (mgCO<sub>2</sub> m<sup>-2</sup> d<sup>-1</sup>)</b> | <b>CH<sub>4</sub> Bubble concentration (mgCH<sub>4</sub> L<sup>-1</sup>)</b> | <b>CH<sub>4</sub> Bubble flux (mgCH<sub>4</sub> m<sup>-2</sup> d<sup>-1</sup>)</b> |
|---------------------------|---------------------------|------------------------------------------------------------------------------|------------------------------------------------------------------------------------|------------------------------------------------------------------------------|------------------------------------------------------------------------------------|
| <i><b>Pond 01</b></i>     |                           |                                                                              |                                                                                    |                                                                              |                                                                                    |
| 30-Jun.-2007              | 1.76                      | 0.60                                                                         | 0.06±0.01                                                                          | 0.07                                                                         | 0.01±0.00                                                                          |
| 10-Jul.-2007              | 2.01                      | 0.33                                                                         | 0.00±0.00                                                                          | 0.09                                                                         | 0.00±0.00                                                                          |
| 17-Jul.-2007              | 1.07                      | 18.53                                                                        | 0.13±0.01                                                                          | 60.7                                                                         | 0.43±0.04                                                                          |
| 23-Jul.-2008              | 0.20                      | 0.42                                                                         | 0.00±0.00                                                                          | 0.18                                                                         | 0.00±0.00                                                                          |
| 31-Jul.-2008              | 1.17                      | 0.53                                                                         | 0.04±0.03                                                                          | 0.52                                                                         | 0.03±0.03                                                                          |
| <i><b>Skeleton L.</b></i> |                           |                                                                              |                                                                                    |                                                                              |                                                                                    |
| 04-Jul.-2007              | 5.51                      | 0.46                                                                         | 0.01                                                                               | -                                                                            | -                                                                                  |
| 10-Jul.-2007              | 6.53                      | 0.28                                                                         | 0.01±0.00                                                                          | 0.00                                                                         | 0.00±0.00                                                                          |
| 17-Jul.-2007              | 5.86                      | 0.29                                                                         | 0.01±0.00                                                                          | 0.05                                                                         | 0.00±0.00                                                                          |
| 23-Jul.-2008              | 2.50                      | 0.64                                                                         | 0.09±0.00                                                                          | 0.04                                                                         | 0.01±0.00                                                                          |
| 31-Jul.-2008              | 2.00                      | 0.61                                                                         | 0.07±0.06                                                                          | 0.04                                                                         | 0.00±0.00                                                                          |

64 **Figures**

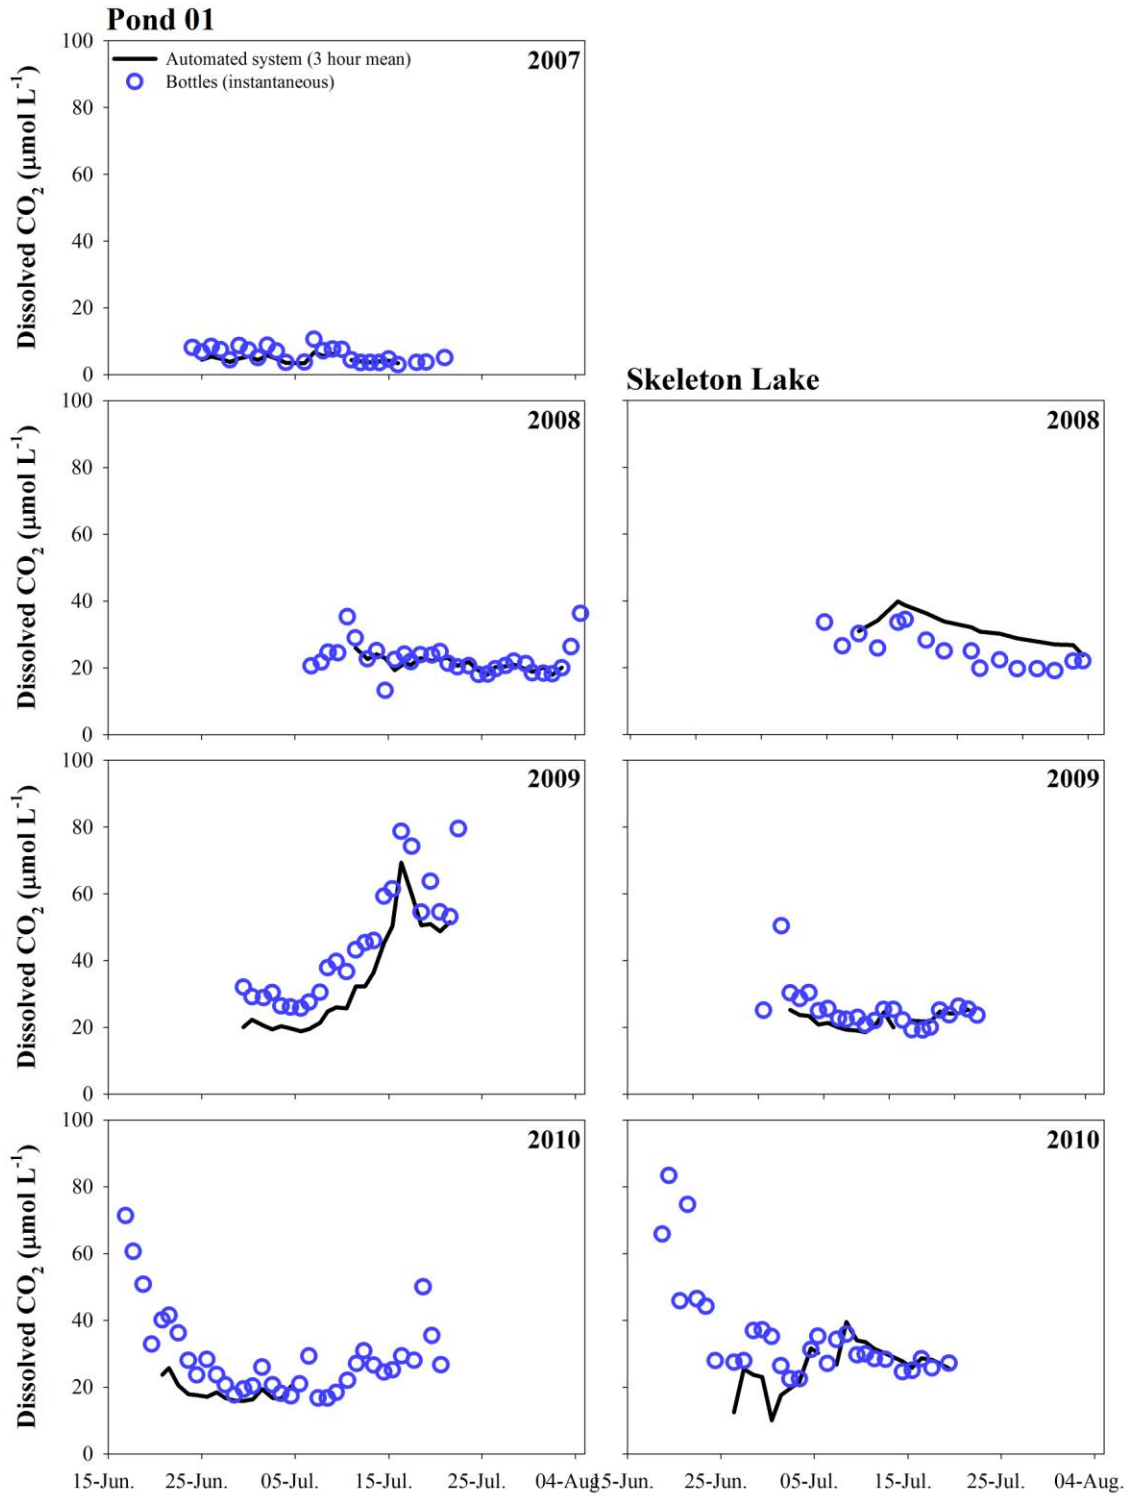

65

66 **Figure S1** Comparison of dissolved CO<sub>2</sub> concentrations between manually-collected bottle  
67 samples and automated systems in Pond 01 and Skeleton Lake during the growing seasons of  
68 2007-2010.

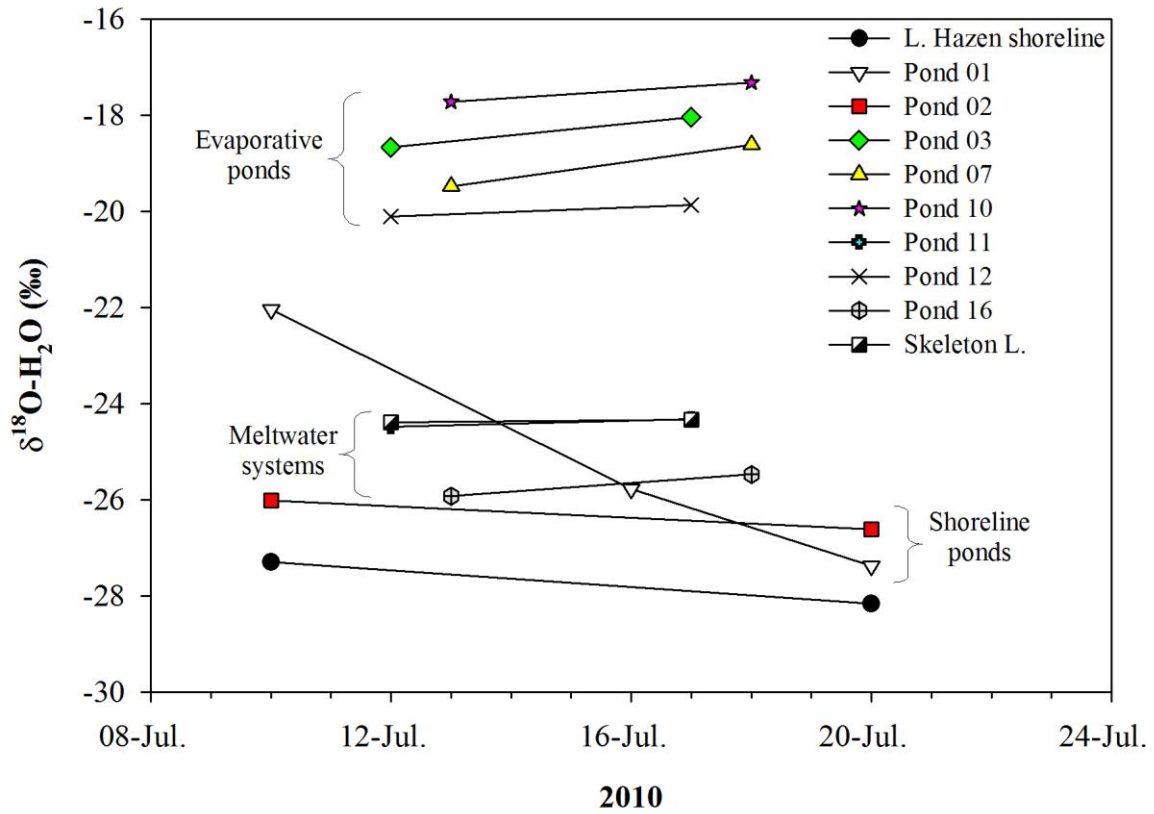

69

70 **Figure S2** Measurements of stable oxygen isotopic composition of water ( $\delta^{18}\text{O}-\text{H}_2\text{O}$ ) from ten  
 71 freshwater systems in the Lake Hazen watershed in July 2010. Grouping of freshwater system  
 72 types followed those delineated in the hierarchical cluster analyses (see Results and Discussion).

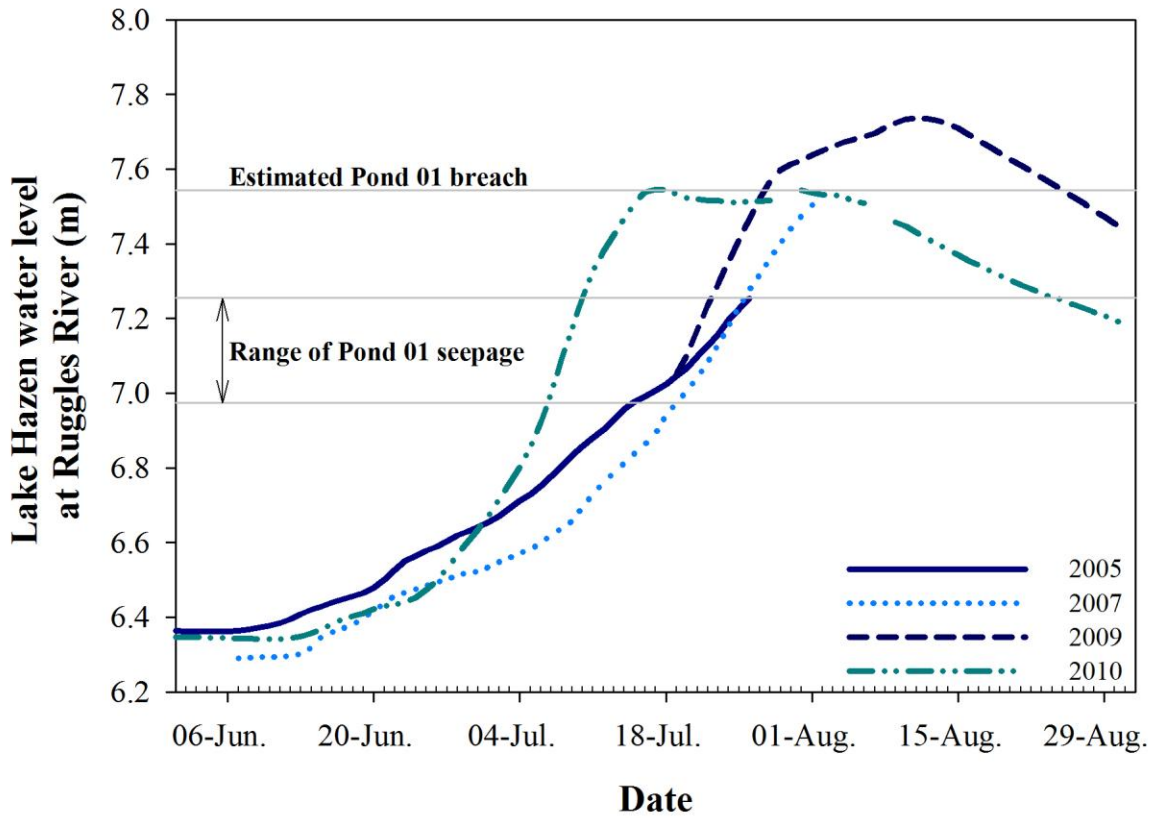

73

74 **Figure S3** Lake Hazen water level data during the summer growing seasons of 2005, 2007, and  
 75 2009-10 at Ruggles River (Water Survey of Canada, 2015). The range of water level when Pond  
 76 01 received Lake Hazen seepage water through its gravel berm is indicated and based on rapid  
 77 changes in greenhouse gases concentrations. Rapid dilution of methane (CH<sub>4</sub>) concentrations and  
 78 field observations were used to determine the water level of pond breach and flushing.



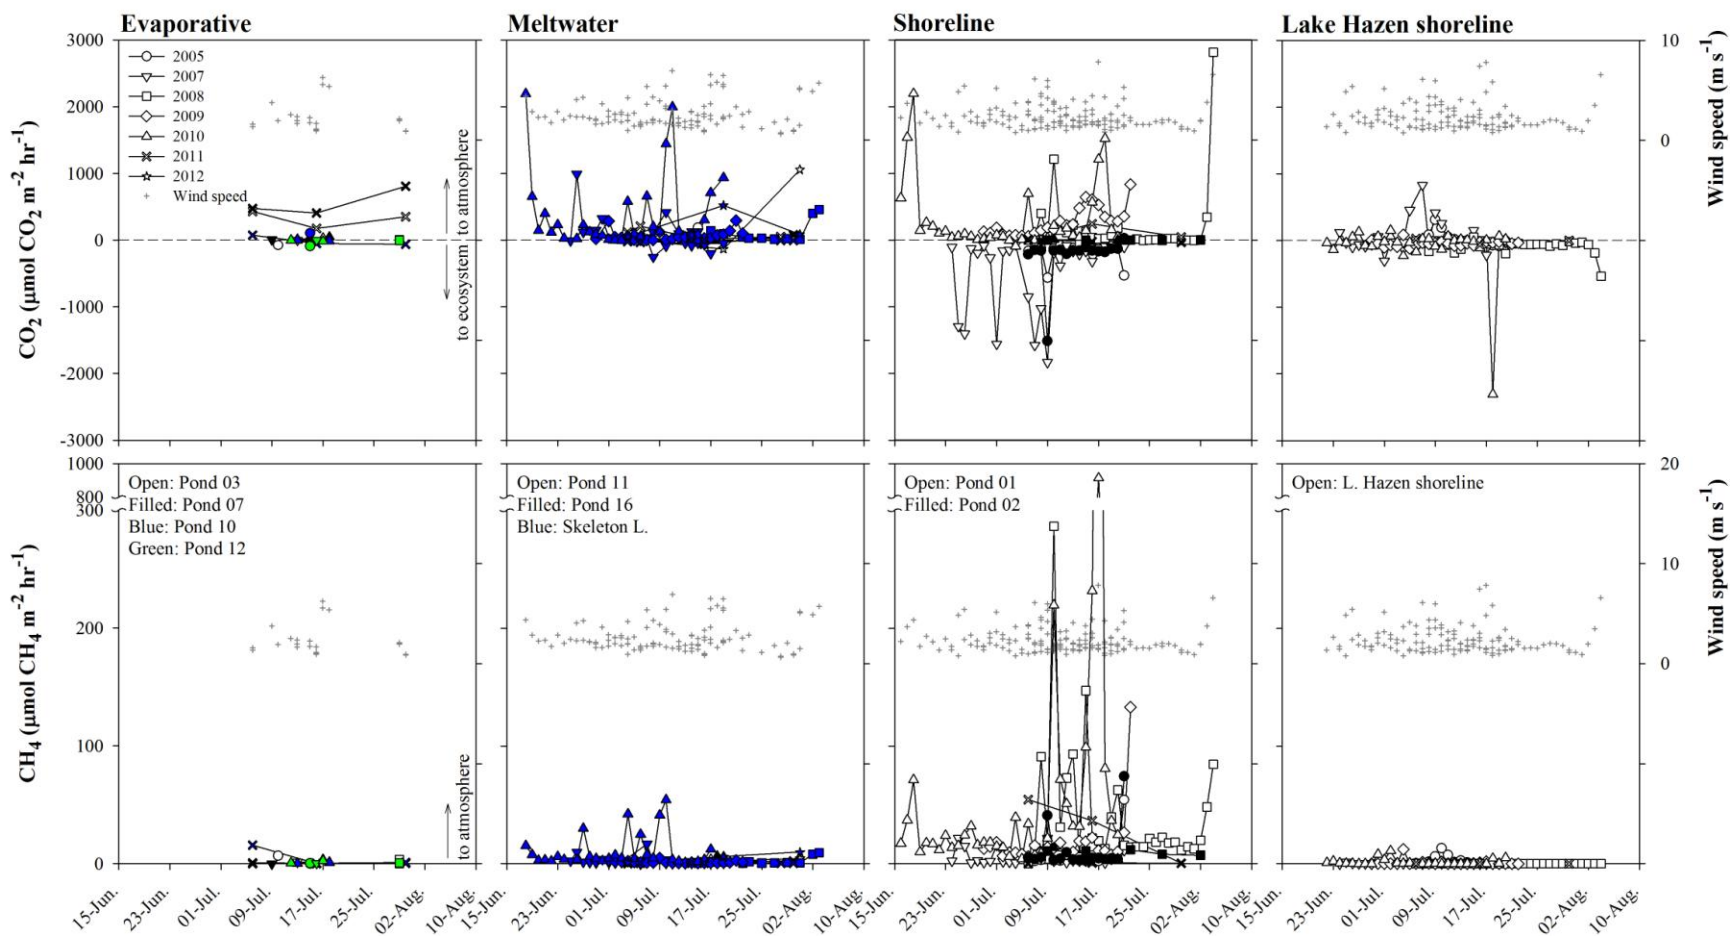

80

81 **Figure S4** Carbon dioxide (CO<sub>2</sub>) and methane (CH<sub>4</sub>) fluxes during the 2005, 2007-2012 growing seasons (June-August) from four  
 82 different freshwater types in the Lake Hazen watershed. Fluxes calculated using empirical equations and site conditions including  
 83 water temperature, wind speed, barometric pressure and gas concentrations in water (see Methods). Daily wind speed from nearest  
 84 measurements indicated by grey points.

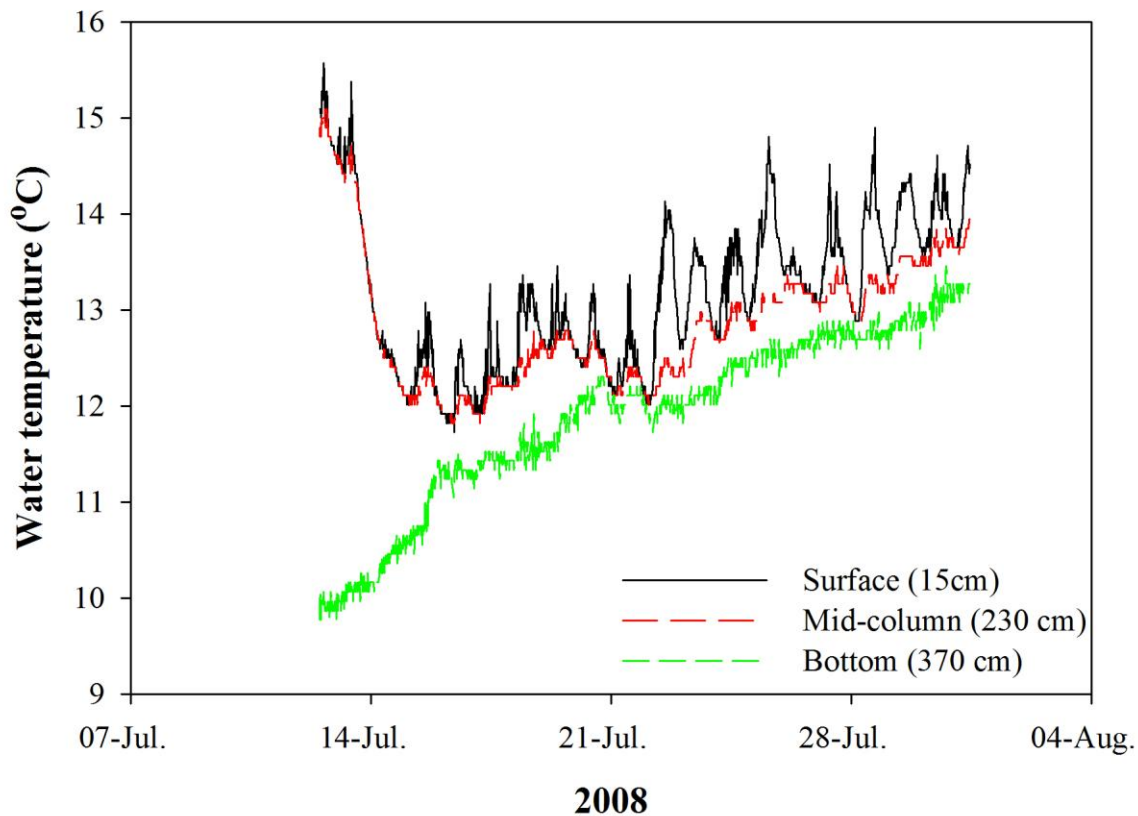

85

86 **Figure S5** Water temperature stratification in Skeleton Lake (Meltwater pond) during the  
 87 summer growing season of 2008.

88 **References**

89 Hamilton JD, Kelly CA, Rudd JWM, Hesslein RH, Roulet NT (1994) Flux to the atmosphere of  
 90 CH<sub>4</sub> and CO<sub>2</sub> from wetland ponds on the Hudson-Bay lowlands (hbIs). *Journal of*  
 91 *Geophysical Research-Atmospheres*, **99**, 1495-1510.

92 Water Survey of Canada. (2015) Real time hydrometric data. Available from:  
 93 [http://www.wateroffice.ec.gc.ca/index\\_e.html](http://www.wateroffice.ec.gc.ca/index_e.html).
