# Supplementary material for: The importance of freshwater systems to the net exchange of atmospheric carbon dioxide and methane with rapidly changing high Arctic landscapes
Source: Copernicus journal article supplement (doi:10.5194/bg-2016-79), 2016-03-14
Supplement: Supplementary file [file bg-2016-79-AC2-supplement.pdf]

# Carbon dioxide and methane fluxes of freshwater systems in the rapidly changing high Arctic

Craig A. Emmerton<sup>1</sup>, Vincent L. St. Louis<sup>1</sup>, Igor Lehnherr<sup>2</sup>, Jennifer A. Graydon<sup>1</sup>, Jane L. Kirk<sup>3</sup>, Kimberly J. Rondeau<sup>1</sup>

<sup>1</sup>Department of Biological Sciences, University of Alberta, Edmonton, Alberta T6G 2E9, Canada

<sup>2</sup>Department Geography, University of Toronto, Mississauga, Ontario, L5L 1C6, Canada

<sup>3</sup>Science and Technology Branch, Environment Canada, Burlington, Ontario, L7R 4A6, Canada

*Correspondence to:* Craig A. Emmerton (emmerton@ualberta.ca)

**Abstract.** A warming climate is rapidly changing the distribution and exchanges of carbon within high Arctic ecosystems. Few data exist, however, which quantify exchange of both carbon dioxide (CO<sub>2</sub>) and methane (CH<sub>4</sub>) between the atmosphere and freshwater systems, or estimate freshwater contributions to total catchment exchange of these gases, in the high Arctic. During the summers of 2005 and 2007-2012, we quantified CO<sub>2</sub> and CH<sub>4</sub> concentrations in, and atmospheric exchange with, common freshwater systems in the high Arctic watershed of Lake Hazen, Nunavut, Canada. We identified four types of biogeochemically-distinct freshwater systems in the watershed, however mean CO<sub>2</sub> concentrations (21–28 μmol L<sup>-1</sup>) and atmospheric exchange (-0.013 to +0.046 g C-CO<sub>2</sub> m<sup>-2</sup> d<sup>-1</sup>) were similar between these systems. Seasonal flooding of ponds bordering Lake Hazen generated considerable CH<sub>4</sub> emissions to the atmosphere (+0.008 g C-CH<sub>4</sub> m<sup>-2</sup> d<sup>-1</sup>), while all other freshwater systems were minimal emitters of this gas (<+0.001 g C-CH<sub>4</sub> m<sup>-2</sup> d<sup>-1</sup>). When using ecosystem-cover classification mapping [and data from previous studies](#), we found that freshwaters were unimportant contributors to total watershed carbon exchange, in part because they covered less than 10% of total [area](#) in the watershed. High Arctic watersheds are experiencing warmer and wetter climates than in the past, which may have implications for [moisture availability, landscape cover, and the exchange of CO<sub>2</sub> and CH<sub>4</sub> of](#) underproductive, [but expansive](#), polar semidesert [ecosystems](#).

---

**Keywords:** carbon dioxide, methane, high Arctic, ponds, lakes, climate change, watershed

## 1 Introduction

[Freshwater ecosystems cover less than 10% of global ice-free land area \(Lehner and Doll, 2004\) and have been typically overlooked as substantial contributors to, or sinks of, atmospheric carbon greenhouse gases \(GHGs; Bastviken et al., 2011\). However, recent studies suggest inland lakes collectively receive and process carbon at magnitudes similar to oceanic uptake and sediment burial, making them important systems within the global carbon](#)

29 cycle (Cole et al., 2007; Battin et al., 2009; Tranvik et al., 2009; Maberly et al., 2013; Raymond et al., 2013).  
30 Northern latitudes, between approximately 45 and 75 °N, contain the highest abundance of lakes, ponds and  
31 wetlands on the planet (Lehner and Doll, 2004) due to historical glaciations and moderate annual precipitation.  
32 These regions also contain the world's largest below-ground stores of organic carbon (Tarnocai et al., 2009). These  
33 carbon and lake-rich northern ecosystems, therefore, have been critically-important sinks historically, and  
34 potentially strong emitters of this legacy carbon moving forward (ACIA, 2004).

35 Most northern lakes are net sources of the GHG carbon dioxide (CO<sub>2</sub>) to the atmosphere (Jonsson et al.,  
36 2003; Tranvik et al., 2009, Laurion et al., 2010). Cold climates, short growing seasons, and light limitation in  
37 stained, carbon-rich waters can inhibit activities of aquatic primary producers (Karlsson et al., 2009), and therefore  
38 the uptake of atmospheric CO<sub>2</sub> by the lake ecosystem. Conversely, heterotrophic respiration by microbes, amplified  
39 under favourable biogeochemical conditions, continues perennially in most lake waters and sediments, therefore  
40 continuously releasing CO<sub>2</sub> to the water column. Turbulence, water temperature, degree of ice-cover and other  
41 factors may then influence the intensity of CO<sub>2</sub> emissions to the atmosphere. Lakes in carbon-rich lower Arctic  
42 regions (~60-70 °N, AMAP, 1998) can account for more than three-quarters of a landscape's net CO<sub>2</sub> emissions to  
43 the atmosphere (Abnizova et al., 2012). At the same time, saturated peatlands and shallow ponds and lakes  
44 throughout much of the lower Arctic can also be robust emitters of the potent GHG methane (CH<sub>4</sub>) to the  
45 atmosphere. Permafrost in northern soils is an effective barrier to drainage of soils, and combined with generally  
46 low-elevation topography, means shallow standing water is prevalent throughout northern latitudes. Anoxic  
47 conditions in saturated, shallow, organic-rich soils have strong potential for methanogenic production and release of  
48 CH<sub>4</sub> into water (Tagesson et al., 2012). Due to its poor solubility, CH<sub>4</sub> can then be effectively released to the  
49 atmosphere from these ecosystems by ebullition and even minor wind turbulence, perhaps contributing up to 12% of  
50 all global emissions (Lai, 2009; Walter et al., 2006). These dynamic and carbon-rich environments, though, are not  
51 ubiquitous across the North, particularly towards the highest latitude regions.

52 In the high Arctic (>~70°N; AMAP, 1998), lake abundance and area are dramatically reduced on the  
53 landscape. The prevalence of cold and dry high pressure air masses results in a semi-arid climate with relatively  
54 well-drained and unproductive inorganic soils (Campbell and Claridge, 1992). This environment, therefore,  
55 discourages surface water retention with often less than 5% of the landscape being covered by aquatic systems.  
56 These conditions, in most cases, restrict primary production and accumulation of organic matter across these

57 landscapes compared to the lower Arctic, with mostly unknown implications for carbon GHG exchange in high  
58 Arctic lakes and ponds. Considering these challenging conditions, it may be easy to overlook the high Arctic, and its  
59 freshwater systems, as important contributors to global carbon cycling (Soegaard et al., 2000; Lloyd, 2001; Lund et  
60 al., 2012, Lafleur et al., 2012). However, recent studies have shown that where conditions are favourable (e.g.,  
61 moist, organic-rich lowlands), high Arctic ecosystems exchange GHGs at rates similar to ecosystems at more  
62 southerly latitudes (Emmerton et al., 2016). Lack of a broad understanding of carbon cycling in high Arctic  
63 freshwater systems is further complicated by rapidly changing climate and landscapes across these latitudes due to  
64 human-induced warming.

65 High Arctic ecosystem productivity is currently changing as a warming climate substantially alters polar  
66 watersheds (IPCC, 2007a). Some climate models predict that in the Canadian Arctic, autumn and winter  
67 temperatures may rise 3-5°C by 2100, and up to 9°C in the high Arctic (ACIA, 2004; IPCC, 2007b). Mean annual  
68 precipitation is projected to increase ~12% for the Arctic as a whole over the same period, and up to 35% in  
69 localized regions where the most warming will occur (ACIA, 2004; IPCC, 2007b). Such warming and wetting is  
70 already modifying Arctic landscape energy balances (Euskirchen et al., 2007) resulting in glacial melt (Pfeffer et al.,  
71 2008), permafrost thaw (Froese et al., 2008), reorganized hydrological regimes (i.e., drying or wetting; Smith et al.,  
72 2008) and extended growing seasons (Myneni et al., 1997). These changes are also perturbing watershed carbon  
73 cycling through, for example, the liberation of carbon from thawing permafrost, and increases in biological  
74 productivity on landscapes and in lakes, ponds and wetlands (Mack et al., 2004; Smol et al., 2005; Walker et al.,  
75 2006; Smol and Douglas, 2007). However, the net result of these processes on high-latitude freshwater carbon GHG  
76 exchange is not well delineated, nor is the relative contribution of freshwater systems to total landscape CO<sub>2</sub> and  
77 CH<sub>4</sub> exchange. This information, from a rapidly changing and extensive biome (>10<sup>6</sup> km<sup>2</sup>) is critical for improved  
78 global carbon models and budgeting.

79 The primary objective of this study was to measure the net atmospheric exchange of CO<sub>2</sub> and CH<sub>4</sub> with  
80 common high Arctic freshwater ecosystems, and place these findings in context with similar terrestrial studies from  
81 the same high Arctic location. Using these sources together, we aim to delineate a clearer, watershed-scale  
82 understanding of high Arctic exchange of CO<sub>2</sub> and CH<sub>4</sub>.

## 83 2 Methods

### 84 2.1 Location and sampling overview

85 We conducted our research at the Lake Hazen base camp in central Quttinirpaaq National Park, Ellesmere  
86 Island, Nunavut (81.8° N, 71.4° W), Canada's most northerly protected area (Figure 1). Lake Hazen (area: 542 km<sup>2</sup>;  
87 max. depth: 267 m) is the world's largest high Arctic lake, and is surrounded by a substantial watershed (6,901 km<sup>2</sup>)  
88 composed of carbonate, evaporite and dolomite rock (Trettin, 1994) and crysolic soils. About 38% of the Lake  
89 Hazen watershed is glaciated with the balance of area covered by a polar semidesert (>80% of ice-free area; Edlund,  
90 1994), small lakes, ponds and meadow wetlands. The lower Lake Hazen watershed is a high Arctic thermal oasis  
91 (France, 1993) as it experiences anomalously warm growing season (June–August) conditions because it is protected  
92 from cold coastal weather by the Grant Land Mountains and Hazen Plateau (Table S1). For example, mean July air  
93 temperature is typically 8-9 °C at the base camp, compared to July 1981-2010 climate normals of 6.1 °C and 3.4 °C  
94 at the coastal Eureka and Alert weather stations on Ellesmere Island, respectively (Environment Canada, 2016).  
95 Soils in the region are also atypically warm during the summer because of low moisture content and efficient  
96 radiative heating due to an abundance of clear-sky days. These conditions, coupled with continuous daylight during  
97 the growing season, have resulted in a greater diversity and abundance of vegetation and wildlife in the Lake Hazen  
98 watershed compared to surrounding areas (France, 1993), despite receiving only ~34 mm of precipitation during the  
99 growing season (Table S1). Ultra-oligotrophic Lake Hazen itself dominates the freshwater area of the watershed  
100 (Keatley et al., 2007) and receives most of its water annually from rivers discharging melt water from glaciers.  
101 Water exits Lake Hazen via the Ruggles River. Ice-cover can remain on Lake Hazen throughout the growing season,  
102 though in recent years the lake has gone ice-free more frequently, usually by late July. Ponds and a few small lakes  
103 are scattered throughout the lower watershed and are mostly shallow, small in area (~70% are <1 ha) and typically  
104 go ice-free by mid- to late-June each year.

105 To quantify net GHG exchange of typical high Arctic freshwater bodies, we identified several permanent  
106 ponds or small lakes to sample within walking distance of base camp to the northwest of Lake Hazen (Figure 1).  
107 These systems were chosen systematically to incorporate a gradient of watershed position, surface area, mean depth,  
108 emergent vegetation productivity, and hydrological connectivity (Table 1~~Table 1~~). We also sampled shoreline water  
109 of Lake Hazen which potentially interacted with ponds located adjacent to its shoreline. Due to logistical issues  
110 related to accessing this remote area over consistent time periods each year, and due to the distances of some ponds

111 from base camp, we completed an overall unbalanced sampling program in space and time. As a result, we focused  
112 on delineating biogeochemical differences between different types of high Arctic lakes, rather than on inter-annual  
113 biogeochemical trends within lakes. Regardless, all sampling occurred during the summer growing seasons of 2005  
114 to 2012 (except for 2006), between mid-June and early August (Table 2, S2).

## 115 **2.2 Dissolved CO<sub>2</sub> and CH<sub>4</sub> concentrations of high Arctic freshwaters**

116 Two approaches were used to quantify concentrations of dissolved CO<sub>2</sub> and CH<sub>4</sub> in surface waters. The  
117 first approach was employed at all sites and used the common method of collecting water directly into evacuated  
118 160-mL Wheaton glass serum bottles capped with butyl rubber stoppers (Hamilton et al., 1994; Kelly et al., 1997).  
119 Each bottle contained 8.9 g of potassium chloride (KCl) preservative to kill all microbial communities (Kelly et al.,  
120 2001), and 10 mL of ultra high purity dinitrogen (N<sub>2</sub>) as a gas headspace. To collect a sample, a bottle was  
121 submersed ~5 cm below the water surface and punctured with an 18-gauge needle. Barometric pressure and water  
122 temperature were recorded. Dissolved gas samples were stored in the dark at ~5°C until return to the University of  
123 Alberta, where they were analyzed in the accredited Biogeochemical Analytical Service Laboratory (BASL). There,  
124 samples were placed in a wrist-action shaker for 20 minutes to equilibrate dissolved CO<sub>2</sub> and CH<sub>4</sub> with the N<sub>2</sub>  
125 headspace. Headspace CO<sub>2</sub> and CH<sub>4</sub> concentrations were quantified on a Varian 3800 gas chromatograph (GC)  
126 using a flame ionization detector at 250°C with ultra high purity hydrogen (H<sub>2</sub>) as a carrier gas passing through a  
127 hayesep D column at 80°C. A ruthenium methanizer converted CO<sub>2</sub> to CH<sub>4</sub>. Four gas standards (Praxair, Linde-  
128 Union Carbide), ranging from 75 to 6000 parts-per-million for both CO<sub>2</sub> and CH<sub>4</sub>, were used to calibrate the GC. A  
129 Varian Star Workstation program integrated peak areas and only calibration curves with an r<sup>2</sup> >0.99 were accepted  
130 for analyses. A standard was re-analyzed every 10 samples to reconfirm the calibration, and duplicate injections  
131 were performed on all samples. Headspace CO<sub>2</sub> and CH<sub>4</sub> concentrations were converted to dissolved molar  
132 concentrations using Henry's Law, and corrected for temperature and barometric pressure differences between  
133 sample collection and analysis. To quantify dissolved inorganic carbon (DIC) concentrations, samples were acidified  
134 with 0.5 mL H<sub>3</sub>PO<sub>4</sub> to convert all DIC to CO<sub>2</sub>, and then immediately reanalyzed on the GC. DIC concentrations  
135 were calculated as above.

136 The second approach involved two automated systems to determine detailed diel changes in surface water  
137 dissolved CO<sub>2</sub> concentrations at two different sites (Skeleton Lake and Pond 01; Figure 1; Table S2). Dissolved CO<sub>2</sub>  
138 concentrations were measured every three hours during several summers. These systems functioned by equilibrating,

139 over a 20-minute period, dissolved CO<sub>2</sub> from pumped surface waters, with a gas cell in a Celgard MiniModule  
140 Liqui-Cel. The equilibrated gas was then analysed for CO<sub>2</sub> concentration by a LI-COR (Lincoln, NE) 820 infrared  
141 gas analyzer. The systems also measured dissolved oxygen (O<sub>2</sub>) concentrations using a Qubit™ flow-through  
142 sensor. Concentrations were then converted to aqueous molar concentrations using Henry's Law and water  
143 temperature quantified with a Campbell Scientific (Logan, UT) 107-L thermistor. The systems were housed in  
144 watertight cases along the shore from which a sample line extended out into the surface waters, and upon which was  
145 mounted a CS 014A anemometer (1 m height) and a Kipp & Zonen (Delft, The Netherlands) photosynthetically-  
146 active radiation (PAR) LITE quantum sensor. All data were recorded on Campbell Scientific CR10X dataloggers.

### 147 **2.3 Dissolved CO<sub>2</sub> and CH<sub>4</sub> fluxes of high Arctic freshwaters**

148         Though several models exist for quantifying turbulent gas fluxes of lakes (e.g., MacIntyre et al., 2010), we  
149 decided to use the stagnant film model described by Liss and Slater (1974) to quantify net CO<sub>2</sub> and CH<sub>4</sub> mass fluxes  
150 between surface waters and the atmosphere at our remote location. This decision was made because of 24-hour  
151 daylight at our high-latitude location dampened diurnal surface temperature changes to less than 1°C, the general  
152 shallowness of the systems, and the steady, sometimes gusty, wind conditions on site. The stagnant film model  
153 assumes gas concentrations in both surface waters and the atmosphere are well-mixed, and that gas transfer between  
154 the phases occurs via diffusion across a diminutive stagnant boundary layer. Diffusive gas transfer across the  
155 boundary layer is assumed to follow Fick's First Law:

$$156 \quad \text{Gas flux } (\mu\text{mol m}^{-2} \text{ hr}^{-1}) = k(C_{\text{SUR}} - C_{\text{EQL}}) \quad (1)$$

157 where C<sub>SUR</sub> (μmol L<sup>-1</sup>) is the concentration of the gas in surface waters, C<sub>EQL</sub> (μmol L<sup>-1</sup>) is the atmospheric  
158 equilibrium concentration, and k is the gas exchange coefficient, or the depth of water per unit time in which the  
159 concentration of the gas equalizes with the atmosphere (i.e., piston velocity). Values of k (cm hr<sup>-1</sup>) were calculated  
160 using automated systems wind measurements and occasionally from nearby (within 2 km) eddy covariance towers  
161 (Campbell Scientific CSAT3 Sonic Anemometers; 30 min. means), and published empirical relationships (Table S3;  
162 Hamilton et al., 1994). To determine the direction of the flux, atmospheric equilibrium CO<sub>2</sub> and CH<sub>4</sub> concentrations  
163 were quantified using Henry's law, in-situ barometric pressure and air temperature, and mean annual CO<sub>2</sub> and CH<sub>4</sub>  
164 concentrations in the atmosphere during the year of sampling (Environment Canada, 2015). If dissolved CO<sub>2</sub> and  
165 CH<sub>4</sub> concentrations in surface waters were above or below their corresponding calculated atmospheric equilibrium

166 concentrations, the freshwater systems were considered a source (+) or sink (-) relative to the atmosphere,  
167 respectively.

168 We also measured ebullition fluxes of CH<sub>4</sub> to the atmosphere from two freshwater systems (Skeleton Lake,  
169 Pond 01) during two growing seasons using manual bubble collection and GC analysis (see Supporting  
170 Information).

## 171 **2.4 Supporting measurements**

172 We quantified additional physical and chemical parameters in surface waters at the same sites as we  
173 collected our GHG samples, although at reduced sampling frequencies (Table 2, S2). At each site, temperature, pH,  
174 specific conductivity and dissolved O<sub>2</sub> were measured in-situ using a YSI (Yellow Springs, OH) 556 MPS multi-  
175 probe. Water samples were also collected for general chemical analyses (total dissolved nitrogen [TDN], particulate  
176 N, NO<sub>3</sub><sup>-</sup>+NO<sub>2</sub><sup>-</sup>, NH<sub>4</sub><sup>+</sup>, total phosphorus [TP], total dissolved phosphorus [TDP], alkalinity, dissolved organic carbon  
177 [DOC], total dissolved solids, major cations/anions, dissolved iron, chlorophyll-*a* [chl-*a*]) into pre-cleaned HDPE  
178 bottles. These samples were immediately processed in the Lake Hazen/Quttinirpaaq Field Laboratory clean room  
179 after water collection, and stored in the dark at ~5°C or frozen until analysed at the BASL.

## 180 **2.5 Numerical analysis**

181 We used hierarchical clustering analysis (IBM SPSS Statistics 23) to organize ponds and lakes into type  
182 categories based on concurrent GHG and chemistry analyses (10 sites; n=62; Table 2). Because sampling was  
183 unbalanced in frequency and time between sites due to logistical challenges (Table 2; see section 2.1), potential  
184 overlap of chemistries between individual lakes was high, therefore setting a conservative standard for classifying  
185 distinct lake types. We used between-group linkage and squared Euclidean distances to group similar sites together  
186 and delineate distinct high Arctic freshwater types. We then used linear-mixed models (SPSS) to quantify  
187 differences in GHG concentrations and fluxes between these different high Arctic freshwater types. Linear-mixed  
188 models are ideal for analysing non-independent and repeated measures data as they integrate inherent errors in  
189 repeated sampling designs to more clearly distinguish statistical differences between groups. These models also can  
190 efficiently handle unbalanced designs by standardizing results from each site within groups. Linear mixed model  
191 details included: use of an auto-regressive moving average (1,1) repeated covariance model; use of a Maximum  
192 Likelihood estimation method; and variables organized by freshwater type (fixed) and year (random).

## 2.6 Net atmospheric exchange of CO<sub>2</sub> and CH<sub>4</sub> of a large high Arctic watershed

To better understand the role of freshwater ecosystems in regional fluxes of carbon GHGs, freshwater CO<sub>2</sub> and CH<sub>4</sub> fluxes measured in this study were coupled with terrestrial fluxes measured in the watershed during the 2008-12 growing seasons (Emmerton et al., 2014, 2016). The authors measured, using eddy covariance flux towers (CO<sub>2</sub>, CH<sub>4</sub>) and static chambers (CH<sub>4</sub>), growing season carbon GHG exchange with terrestrial polar semidesert and meadow wetland landscapes from 2008-12. Areal coverage of the different ecosystem types in the watershed was isolated from a previous classification of Quttinirpaaq National Park (Edlund, 1994) using a Geographical Information System (ArcGIS v.10.3; ESRI, Redlands, US). Mean growing season fluxes from each measured ecosystem were then weighted to matching coverage area in the watershed to estimate the total carbon gas exchange with the atmosphere. Glacial ice was assumed to be a net-zero contributor of total watershed gas exchange in this scaling exercise.

## 3 Results

### 3.1 Biogeochemical classification of high Arctic freshwaters

Four distinct types of freshwater systems were evident from our sampling in the Lake Hazen watershed (Table 3; Error! Reference source not found.Figure-; hierarchical cluster analysis; see Methods). “Evaporative” ponds (Ponds 07, 10, 12) occurred in the upland of the Lake Hazen catchment and were hydrologically-isolated from their surrounding basins post-snowmelt. These ponds were relatively high in concentrations of total dissolved solids, most measured ions, DIC, DOC, organic particles, TDP and chl-*a*. Pond 03, though not technically clustered with others, was forced to the Evaporative pond category based on lack of consistent inflowing water and high concentrations of most dissolved ions. This delegation was further consistent with isotopic measurements of oxygen ( $\delta^{18}\text{O-H}_2\text{O}$ ) in water taken from each aquatic system in July 2010 (Figure S2). “Meltwater” systems, including Ponds 11, 16 and Skeleton Lake, also occurred in the upland of the Lake Hazen watershed, but received consistent water supply through the growing season primarily from snowmelt, permafrost/ground ice thaw water or upstream lake drainage. The general chemistry of these systems was therefore consistent and without extremes during the growing season (see section 3.2). Typical meltwater streams draining to these ponds were high in TDN and sulfate (SO<sub>4</sub><sup>2-</sup>), but low in DOC (Table 3), though streams drained through marginal wetlands surrounding the lakes and ponds downstream of our sampling sites. “Shoreline” ponds (Ponds 01, 02) occurred along the margin of Lake



248 Hazen and were typically physically isolated from the large lake by porous gravel berms, and surrounded by wetland  
249 soils and flora during spring low water conditions. As glacial melt accelerated throughout the growing season,  
250 though, the water level of Lake Hazen rose and could seep through the berms to incrementally flood the ponds and  
251 surrounding wetlands (Figure S3). Shoreline ponds changed chemically during the onset of flooding as indicated, for  
252 example, by an increase in the concentration of  $\text{NO}_3^- + \text{NO}_2^-$  (Table 3). A separate smaller cluster of Pond 01 samples  
253 occurred during particularly high-water periods when Lake Hazen breached the berms (Error! Reference source  
254 not found, Figure). The flooding water from the “Lake Hazen shoreline” was cold, dilute in dissolved ions, organic  
255 matter, TDN, and chl-*a*, but considerably higher in  $\text{NO}_3^- + \text{NO}_2^-$  compared to other water bodies.

## 256 3.2 Dissolved concentrations and net atmospheric exchange of $\text{CO}_2$ and $\text{CH}_4$ of high Arctic freshwaters

### 257 3.2.1 $\text{CO}_2$

258 Growing season concentrations of dissolved  $\text{CO}_2$  in sampled high Arctic freshwaters from 2005 to 2012  
259 varied substantially within and between the system types, and therefore overall resulted in non-significant  
260 differences between them (Figure 2, 3, S4, S5).

261 On average, Evaporative ponds had the highest mean  $\text{CO}_2$  concentrations (mean $\pm$ SE;  $27.9 \pm 4.9 \mu\text{mol L}^{-1}$ )  
262 compared to other pond types (Figure 3), primarily due to conditions in Pond 03 and Pond 07. These ponds were the  
263 shallowest of the four sampled and were rich in dissolved iron, DIC, and TDP.  $\text{CO}_2$  concentrations were above  
264 atmospheric equilibrium concentration (Figure 2) and therefore these ponds were sources of the gas to the  
265 atmosphere ( $+177 \pm 66 \mu\text{mol CO}_2 \text{ m}^{-2} \text{ hr}^{-1}$ ; Figure 3). The other Evaporative ponds (Ponds 10, 12) were deeper and  
266 had  $\text{CO}_2$  concentrations that were typically near those of the atmosphere. This contributed to their near-zero  
267 exchange of  $\text{CO}_2$  with the atmosphere ( $-5 \pm 17 \mu\text{mol CO}_2 \text{ m}^{-2} \text{ hr}^{-1}$ ). Together, dissolved  $\text{CO}_2$  concentrations correlated  
268 closely and positively with DOC and dissolved iron concentrations in Evaporative ponds (Table S4). When  
269 combining all Evaporative ponds together, they were net sources of  $\text{CO}_2$  to the atmosphere ( $+73 \pm 93 \mu\text{mol CO}_2 \text{ m}^{-2}$   
270  $\text{hr}^{-1}$ ; Figure 3).

271 Meltwater systems had lower, but insignificantly different,  $\text{CO}_2$  concentrations ( $26.2 \pm 3.9 \mu\text{mol L}^{-1}$ ) than  
272 Evaporative ponds (Figure 3). Meltwater systems showed only gradual, venting-related declines of  $\text{CO}_2$   
273 concentrations through the summer, with strong consistency in concentrations between sampling times and sites  
274 (Figure 2). However, they emitted higher, though not significantly different, fluxes of  $\text{CO}_2$  to the atmosphere overall  
275 ( $+160 \pm 66 \mu\text{mol m}^{-2} \text{ hr}^{-1}$ ; Figure 3) compared to the other types of systems.  $\text{CO}_2$  concentrations of these systems

276 | correlated strongly and positively with CH<sub>4</sub> concentrations, but negatively with DOC concentrations and  
277 | measurements that were of high concentrations in Meltwater streams draining into the systems (e.g., SO<sub>4</sub><sup>2-</sup>, TDN;  
278 | Table 3, S4). Mean diurnal trends in CO<sub>2</sub> concentrations across all sampling years, as measured by the automated  
279 | system at Skeleton Lake, showed that CO<sub>2</sub> and O<sub>2</sub> concentrations had little association together (Pearson correlation:  
280 | r= -0.18, df=7; p=0.67), but CO<sub>2</sub> associated strongly and negatively with water temperature (r=-0.97, df=7, p<0.001;  
281 | Figure 4).

282 | Mean CO<sub>2</sub> concentrations of Shoreline ponds (22.5±3.7 μmol L<sup>-1</sup>; Figure 3) were similar to the other pond  
283 | types, which obscured their considerable seasonal changes within and between growing seasons. From 2005 to  
284 | 2007, both Pond 01 and Pond 02 received little floodwater from Lake Hazen due to lower lake water levels (Figure  
285 | 2). These conditions resulted in dense wetland vegetation growth surrounding the ponds and low mean daily  
286 | dissolved CO<sub>2</sub> concentrations (6.5±0.4 μmol L<sup>-1</sup>) and strong uptake of atmospheric CO<sub>2</sub> (-329±59 μmol m<sup>-2</sup> hr<sup>-1</sup>).  
287 | The drier wetland state of these ponds changed in following summers when Lake Hazen rose substantially upon  
288 | greater inputs of glacial meltwaters (WSC, 2015), causing the rising waters to seep through porous berms into the  
289 | ponds through July. In concert with flooding, concentrations of CO<sub>2</sub> from 2008-11 of each pond together increased  
290 | substantially (30.1±1.5 μmol L<sup>-1</sup>) resulting in strong net emissions of CO<sub>2</sub> to the atmosphere (+228±44 μmol m<sup>-2</sup> hr<sup>-1</sup>  
291 | <sup>1</sup>). Changing dissolved CO<sub>2</sub> concentrations correlated positively with dissolved nutrients and ions (Table S4).  
292 | Diurnal trends of CO<sub>2</sub> and O<sub>2</sub> concentration measured by the automated system at Pond 01 over several growing  
293 | seasons showed opposite diel patterns of the gases, with greater O<sub>2</sub> during the warmest and lightest parts of the day  
294 | (r=-0.98, df=7, p<0.001; Figure 4). However, the net result of strong seasonality in these ponds was slight net  
295 | emission of CO<sub>2</sub> to the atmosphere (+42±60 μmol m<sup>-2</sup> hr; Figure 3) that was not statistically-different from other  
296 | types of freshwaters.

297 | Lake Hazen shoreline water, though not necessarily representative of the entire lake itself, was  
298 | characteristic of its moat occurring early each growing season, and of water that intruded Shoreline ponds in July.  
299 | This water was generally near atmospheric equilibrium concentrations of CO<sub>2</sub> (21.0±7.8 μmol L<sup>-1</sup>; Figure 2) with  
300 | stable and low CO<sub>2</sub> uptake throughout the season (-44±66 μmol m<sup>-2</sup> hr; Figure 3). CO<sub>2</sub> concentrations of this  
301 | shoreline water related strongest and positively with DIC, NO<sub>3</sub><sup>-</sup>+NO<sub>2</sub><sup>-</sup>, major ions and wind speed (Table S4).

### 328 3.2.2 CH<sub>4</sub>

329 Each of Evaporative, Meltwater and Lake Hazen shoreline freshwaters had statistically similar and low  
330 CH<sub>4</sub> concentrations (0.06-0.14 μmol L<sup>-1</sup>) and fluxes (+0 to +3 μmol m<sup>-2</sup> hr<sup>-1</sup>) across all growing seasons (Figure 2,3,  
331 S4, S5). Evaporative ponds had generally flat seasonal CH<sub>4</sub> concentration and flux trends (Figure 2), except for an  
332 outlier sample from Pond 10 in mid July 2011. CH<sub>4</sub> concentrations correlated strongest with NO<sub>3</sub><sup>-</sup>+NO<sub>2</sub><sup>-</sup> and  
333 alkalinity (Table S4). Meltwater systems were also generally low in CH<sub>4</sub> concentrations and fluxes through the  
334 summers and associated positively and closely with CO<sub>2</sub> concentrations, and strongly but negatively with SO<sub>4</sub><sup>2-</sup>,  
335 alkalinity and other ions (Table S4). Notable flux emissions from these systems only occurred during episodic wind  
336 events, also similar to CO<sub>2</sub> (Figure S5). However, unlike CO<sub>2</sub>, higher CH<sub>4</sub> concentrations were sustained into July in  
337 Skeleton Lake in 2010 (Figure 2). Lake Hazen shoreline water showed low and stable CH<sub>4</sub> concentrations and fluxes  
338 each growing season with infrequent and small releases of the gas to the atmosphere. CH<sub>4</sub> concentrations in this  
339 water correlated positively only with particulate carbon concentrations (Table S4).

340 Shoreline ponds, alternatively, had significantly higher CH<sub>4</sub> concentrations relative to the other systems  
341 (1.18±0.16 μmol L<sup>-1</sup>; Figure 3) and showed a dynamic seasonal pattern dominated by the timing of flooding (Figure  
342 2). In 2005 and 2007 before substantial seasonal flooding started to occur, CH<sub>4</sub> concentrations (0.29±0.03 μmol L<sup>-1</sup>)  
343 and fluxes to the atmosphere (+8±2 μmol m<sup>-2</sup> hr<sup>-1</sup>) were low. As the Shoreline ponds began to receive NO<sub>3</sub><sup>-</sup>+NO<sub>2</sub><sup>-</sup>-  
344 rich flood water from Lake Hazen by mid-summer in subsequent years (Table 3), 2008-11 CH<sub>4</sub> concentrations and  
345 fluxes increased substantially (1.70±0.13 μmol L<sup>-1</sup>; +41±10 μmol m<sup>-2</sup> hr<sup>-1</sup>) and correlated closely with dissolved  
346 organic and inorganic nitrogen (Table S4). This significant increase in CH<sub>4</sub> flux emissions from Shoreline ponds  
347 during flooding (>five times higher than during dry periods) was coupled with large increases in pond surface areas,  
348 effectively producing even higher total CH<sub>4</sub> emissions to the atmosphere. Towards the end of July during flooding  
349 conditions, full berm breach of the Shoreline ponds by rising Lake Hazen waters occurred resulting in rapid dilution  
350 of CH<sub>4</sub> concentrations, but logistical constraints prevented later summer sampling to investigate if concentrations  
351 rebounded thereafter. Overall, aided by poor solubility of CH<sub>4</sub> in water and episodic wind events (Figure S5), the  
352 flooding of Shoreline ponds drove significantly larger CH<sub>4</sub> emissions to the atmosphere compared to other pond  
353 types (+28±5 μmol m<sup>-2</sup> hr<sup>-1</sup>; Figure 3).

### 354 **3.3 Net atmospheric exchange of CO<sub>2</sub> and CH<sub>4</sub> of a large high Arctic watershed**

355           When scaled to total watershed area including Lake Hazen (7,443 km<sup>2</sup>), polar semidesert landscapes were  
356 inconsequential to total CO<sub>2</sub> exchange (-1,253 Mg C-CO<sub>2</sub>; 9% of total exchange) despite comprising a substantial  
357 proportion of the catchment (3,819 km<sup>2</sup>; 51%; [Table 4](#)). All types of standing freshwaters sampled in the watershed  
358 from this study showed statistically-similar CO<sub>2</sub> fluxes compared to the polar semidesert. When assuming its  
359 shoreline waters were representative of the entire lake area [as recent evidence suggests \(unpublished data, 2015\)](#), the  
360 expansive Lake Hazen (542 km<sup>2</sup>; 7%) exchanged relatively little CO<sub>2</sub> with the atmosphere (-721 Mg C-CO<sub>2</sub>; 5%), as  
361 did smaller freshwater systems (144 km<sup>2</sup>; 2%) in the watershed (600 Mg C-CO<sub>2</sub>; 4%). In clear contrast, during the  
362 growing season, moist and vegetated meadow wetland ecosystems were found to consume CO<sub>2</sub> at rates similar to  
363 wetlands in the southern Arctic (-0.96 g C-CO<sub>2</sub> m<sup>-2</sup> d<sup>-1</sup>; Emmerton et al., 2016). Consequently, meadow wetlands  
364 exchanged an estimated 82% (-11,368 Mg C-CO<sub>2</sub>) of total CO<sub>2</sub> with the atmosphere despite occupying only 2%  
365 (129 km<sup>2</sup>) of the area in the Lake Hazen watershed. Total CO<sub>2</sub> exchange of the watershed was -10,236 Mg C-CO<sub>2</sub> (-  
366 1.38 g C-CO<sub>2</sub> m<sup>-2</sup>) during the growing season.

367           The high Arctic polar semidesert has recently gained attention as a notable atmospheric sink of CH<sub>4</sub> (-0.001  
368 g C-CH<sub>4</sub> m<sup>-2</sup> d<sup>-1</sup>; Emmerton et al., 2014), which has since been observed in studies at other high Arctic locations  
369 (e.g., Jorgensen et al., 2015). These uptake fluxes coupled with its expansive coverage made the polar semidesert the  
370 key landscape controlling net CH<sub>4</sub> exchange throughout the Lake Hazen watershed (-412 Mg C-CH<sub>4</sub>; 94% of total  
371 exchange; [Table 4](#)). Surprisingly, a productive meadow wetland in the watershed was a weaker emitter of CH<sub>4</sub> to the  
372 atmosphere (+0.001 g C-CH<sub>4</sub> m<sup>-2</sup> d<sup>-1</sup>) compared to other high Arctic wetlands (Emmerton et al., 2014), releasing  
373 only 10 Mg C-CH<sub>4</sub> (2%) to the atmosphere during the growing season. All upland freshwater systems (Evaporative  
374 and Meltwater systems) had low emissions of CH<sub>4</sub> to the atmosphere (11 Mg C-CH<sub>4</sub>; 2%), as did Lake Hazen itself  
375 (+6 Mg C-CH<sub>4</sub>; 1%). All measured ecosystems had statistically-similar CH<sub>4</sub> fluxes except for the strong CH<sub>4</sub>-  
376 producing Shoreline ponds ([Table 4](#)). However, poor areal coverage of these dynamic systems in the watershed (0.6  
377 km<sup>2</sup>; <1%) resulted in contributions of <<1% (+0.4 Mg C-CH<sub>4</sub>) of all CH<sub>4</sub> exchange in the Lake Hazen watershed (-  
378 385 Mg C-CH<sub>4</sub>; -0.052 g C-CH<sub>4</sub> m<sup>-2</sup>).

## 4 Discussion

### 4.1 Dissolved concentrations and net atmospheric exchange of CO<sub>2</sub> and CH<sub>4</sub> of high Arctic freshwaters

#### 4.1.1 CO<sub>2</sub>

Dissolved CO<sub>2</sub> was likely being produced effectively in all Evaporative ponds by ecosystem metabolism because of their high concentrations of DOC. These, another other, isolated systems concentrate many solutes in their waters including degraded allochthonous and fresh autochthonous DOC (Tank et al., 2009), which would be available as a source of energy to heterotrophs. Accumulation and dissociation of weathered carbonates and evaporates in these moderately warm, high alkalinity environments (2-5 mEq L<sup>-1</sup>) may have also been important (Trettin, 1994; Marcé et al., 2015). However, differences in pond volumes likely controlled the ultimate concentrations of CO<sub>2</sub> found in Evaporative ponds. Small and shallow Evaporative ponds (Ponds 03, 07) showed much higher concentrations compared with those that were larger and deeper (Ponds 10, 12) and were therefore more susceptible to wind-related turbulence and gas exchange with the atmosphere.

The biogeochemistry of Meltwater systems was steady and similar between sites, possibly related to stream flushing, but they ultimately had similar CO<sub>2</sub> concentrations and fluxes as other freshwater types. This occurred despite inclusion of early summer sampling at Skeleton Lake (2007, 2010) when CO<sub>2</sub> concentrations were higher as post-ice-covered waters were re-equilibrating with the atmosphere (Kling et al., 1992; Karlsson et al., 2013). However, fluxes of CO<sub>2</sub> to the atmosphere from these systems did not correspond closely with early season venting, but rather to the frequency of episodic releases of CO<sub>2</sub> to the atmosphere (Figure S5). This may have been related to their greater mean depths, which promoted stratification in at least one of our sampled Meltwater systems (Skeleton Lake; Figure S6). Stratification would confine decomposition products (e.g., CO<sub>2</sub>, CH<sub>4</sub>) to near their sites of origin in bottom sediments and extensive benthic mat communities, which would then be released most readily during and just after wind mixing events. We observed evidence of this process via strong positive correlations between CO<sub>2</sub> and CH<sub>4</sub> concentrations in surface waters (Table S4). Results from our automated systems supported this argument as mean diurnal CO<sub>2</sub> and O<sub>2</sub> concentrations in surface waters of Skeleton Lake associated poorly together, rather than oppositely if metabolic processes (i.e., primary productivity or decomposition of organic matter; see Pond 01 below) were dominant drivers in surface waters. Mixing-related releases of CO<sub>2</sub> would be offset by calmer, lower-flux conditions when DOC concentrations may have been higher in upper layers. Meltwater streams flushing

406 through marginal wetlands before entry into the Meltwater systems, but then not mixing with the entire lake, may  
407 explain the negative correlation observed between CO<sub>2</sub> and DOC concentrations.

408 Shoreline ponds changed drastically in size and chemistry in response to seasonal flooding by Lake Hazen  
409 shoreline water (Table 1, 3). During pre-flooding conditions, CO<sub>2</sub> concentrations were low which could be attributed  
410 to DIC use by autotrophic plankton (pre-flooding: 1.2 µg L<sup>-1</sup> chl-*a*; post-flooding: 0.4 µg L<sup>-1</sup> chl-*a*), but more  
411 likely by observed dense benthic and macrophytic communities along the margins of the ponds (Tank et al., 2009).  
412 When inundated by flood waters, CO<sub>2</sub> concentrations rose sharply which is typically observed in flooded wetlands  
413 (Kelly et al., 1997). This occurs because widespread inundation of plants and soils typically prompts rapid  
414 decomposition (Table S4). Although negatively correlated diurnal CO<sub>2</sub> and O<sub>2</sub> concentrations suggest that primary  
415 productivity was consistently occurring in Shoreline pond surface waters, flooding of the ponds was ultimately the  
416 more important process controlling seasonal CO<sub>2</sub> concentrations.

417 CO<sub>2</sub> concentrations in Lake Hazen shoreline water were near atmospheric equilibrium and only weakly  
418 consumed atmospheric CO<sub>2</sub>. These results along the shoreline appear to be similar to other locations offshore  
419 (unpublished, 2015) and were reflective of most deep lakes with extremely low nutrient, organic matter and chl-*a*  
420 concentrations (0.20 µg L<sup>-1</sup>; Keatley et al., 2007; Babaluk et al., 2009). CO<sub>2</sub> gas exchange between the lake and the  
421 atmosphere correlated well with DIC, alkalinity and other ions, which are considerable in glacial rivers draining to  
422 the lake (Babaluk et al., 2009). These rivers were also strongly undersaturated in CO<sub>2</sub>, as observed elsewhere in  
423 glacial environments (Meire et al., 2015), and may explain the slight CO<sub>2</sub> uptake observed by the lake, especially  
424 later in summer.

#### 425 4.1.2 CH<sub>4</sub>

426 Evaporative and Meltwater systems were typically weak producers and emitters of CH<sub>4</sub>, which was  
427 possibly related to concurrently high SO<sub>4</sub><sup>2-</sup> concentrations in these systems due to additions of water draining  
428 evaporite geologies (Table 3; Trettin, 1994). This may have given competitive advantage to SO<sub>4</sub><sup>2-</sup>-reducing bacterial  
429 communities in sediments, which typically outcompete methanogenic bacteria for hydrogen. This hypothesis was  
430 supported by the prevalence of H<sub>2</sub>S gas in collected sediment cores from Skeleton Lake (unpublished, 2013) and by  
431 the trivial fluxes of CH<sub>4</sub> in bubbles measured emerging from sediments (+0.00 to +0.01 mg m<sup>-2</sup> d<sup>-1</sup>; Table S5; see  
432 Supporting Information). Stratification in Meltwater systems and the only periodic wind-related releases of CH<sub>4</sub>,  
433 similar to CO<sub>2</sub>, likely also limited CH<sub>4</sub> emissions (Table S4). Low production and exchange of CH<sub>4</sub> in Lake Hazen,

434 | alternatively, was most likely associated with the lake's ultra-oligotrophic standing ([Keatley et al., 2007](#)), well-  
435 | oxygenated water, and little accumulation of littoral organic matter where anoxia could prevail and CH<sub>4</sub> be  
436 | produced. Only during periods of strong wind mixing of surface waters, or when Shoreline ponds breached [and](#)  
437 | [mixed organic particles \(Table S4\) across its shoreline](#), did [the near shore waters of Lake Hazen release CH<sub>4</sub> to the](#)  
438 | [atmosphere](#) above near-zero values.

439 | Shoreline ponds were regional "hot-spots" of CH<sub>4</sub> exchange, which was clearly driven by seasonal  
440 | flooding, [and releases of organic matter and nutrients \(Table S4\)](#). Pre-flooding conditions in the ponds were  
441 | characterized by dry and oxygenated wetland soils which were exposed to the atmosphere and not connected to the  
442 | central pond where we sampled. Flooding induced saturation of organic soils surrounding the wetland and perhaps  
443 | provided advantageous conditions for anaerobic metabolism, including methanogenesis. This may have been further  
444 | supported by the flushing of the ponds with SO<sub>4</sub><sup>2-</sup>-poor Lake Hazen water, therefore [potentially](#) favouring  
445 | metabolism of methanogens over SO<sub>4</sub><sup>2-</sup>-reducers in the flooded soils.

#### 446 | **4.2 Net atmospheric exchange of CO<sub>2</sub> and CH<sub>4</sub> of a large high Arctic watershed**

447 | [Studies from the southern Arctic have estimated that fluxes of CO<sub>2</sub> \(e.g., -1.55 to +1.10 g C-CO<sub>2</sub> m<sup>-2</sup> d<sup>-1</sup>,](#)  
448 | [Tank et al., 2009, Abnizova 2012\) and CH<sub>4</sub> \(+0.01 to +0.09 g C-CH<sub>4</sub> m<sup>-2</sup> d<sup>-1</sup>, Walter 2006, Sachs 2010\) from ponds](#)  
449 | [and lakes can contribute a strong majority of a region's total exchange of CO<sub>2</sub> and CH<sub>4</sub> with the atmosphere \(Sachs](#)  
450 | [et al., 2010; Abnizova et al., 2012\). Carbon and nutrient-rich soils, longer growing seasons, and high densities of](#)  
451 | [aquatic and wetland ecosystems are likely key characteristics responsible for these strong signals. To our](#)  
452 | [knowledge, concurrent measurement of freshwater and terrestrial carbon GHG exchange at a high Arctic location](#)  
453 | [has not occurred previous to this study. We found that in a large high Arctic watershed, a size range from small](#)  
454 | [ponds up to one of the world's largest high-latitude lakes, together contributed only an estimated 9% \(CO<sub>2</sub>; -0.01 to](#)  
455 | [+0.05 g C-CO<sub>2</sub> m<sup>-2</sup> d<sup>-1</sup> and 3% \(CH<sub>4</sub>; +0.00 to +0.01 g C-CH<sub>4</sub> m<sup>-2</sup> d<sup>-1</sup> of all carbon GHG exchanges \(Table 4\).](#)  
456 | [Several reasons may explain the limited role of aquatic systems there. First, pond and lake coverage in the high](#)  
457 | [Arctic is typically very low \(<10% of Lake Hazen watershed; Table 4\) compared to the southern Arctic \(Lehner and](#)  
458 | [Doll, 2004\). Well-drained soils, a semi-arid climate and continuous evaporation throughout a 24-hour daylight](#)  
459 | [growing season all contribute to negative pond and lake water balances often observed across the high Arctic \(Woo](#)  
460 | [and Guan, 2006\). Second, growing seasons of high Arctic freshwaters are very short as ice-cover can remain](#)  
461 | [perennially on some lakes, or may vacate for only three months \(Rautio et al., 2011\). Though ponds in the Lake](#)

462 Hazen watershed can warm to moderate levels compared to other Arctic locations (Table 3, Rautio 2011), time  
463 exposure to these temperatures is short and likely limits growing season autotrophic and heterotrophic activity and  
464 their contributions to freshwater carbon gas exchange. Geochemical production of CO<sub>2</sub> in high-alkalinity ponds and  
465 lakes is also lessened in only moderately warm environments (Marcé et al., 2015). Third, runoff delivered to high  
466 Arctic freshwaters is typically dilute, nutrient-poor and low in quality organic matter because it drains among the  
467 most unproductive and desiccated soils anywhere on Earth (ACIA, 2004). Therefore, neither important nutrients key  
468 for aquatic photosynthesis (Markager et al., 1999), nor labile carbon for heterotrophic activities are supplied to many  
469 high Arctic lakes in great quantities, thus limiting potential biological carbon GHG uptake or emission. These  
470 constraints on aquatic productivity were visible at our sites as few were dominated by productive emergent plants,  
471 but rather by barren lake beds or submerged benthic mats of weaker productivity.

472 Despite a challenging climate and poor-quality substrates, our results suggest that the degree of moisture  
473 availability in high Arctic ecosystems was an overarching control on CO<sub>2</sub> exchanges. Running water environments  
474 are the most productive landscapes in the Lake Hazen watershed (Table 4) because they are consistently wet, but not  
475 starved of (e.g., polar semidesert) or inundated by (e.g., ponds, lakes) water. These ideal conditions support  
476 productive emergent plant communities, which typically outgrow other vegetation types along the terrestrial-aquatic  
477 watershed gradient (Wetzel, 2001). This occurred despite low soil temperatures in these wetlands because of shallow  
478 permafrost tables. Productive standing water environments were rare in the Lake Hazen watershed, except for  
479 Shoreline ponds during their drier wetland phase. However, the flooding hydrology of Lake Hazen promoted a near  
480 balance of net autotrophy and heterotrophy in these systems. For CH<sub>4</sub>, the spatial coverage of ecosystem types was  
481 the most important factor controlling its exchange at the watershed scale. Only Shoreline ponds, due to the flooding  
482 of its wetland vegetation, were substantially higher in per-unit CH<sub>4</sub> gas exchange than other ecosystems (Table 4).  
483 However, net uptake of CH<sub>4</sub> by methanotrophs in polar semidesert soils was ultimately of greatest importance at the  
484 watershed scale because of the landscape's extensive spatial coverage relative to other ecosystem types. This finding  
485 supports other recent studies which highlight the potential global importance of this substantial high Arctic CH<sub>4</sub> sink  
486 (Jorgensen et al., 2015).

487 Modification of moisture availability in high Arctic regions is likely in a changing climate. High Arctic  
488 latitudes are expected to endure considerable warming and increased precipitation, resulting in shifting snow and ice  
489 phonologies, greater contributions to runoff from subsurface ice and glaciers, and greater evaporation rates (ACIA,



490 2004). These changes will affect the distribution and sustainability of water across high Arctic landscapes. Smol and  
491 Douglas (2007) have suggested that negative water balances and the drying of small and shallow aquatic systems  
492 will become a more frequent response to rapidly increasing temperatures and enhanced evaporation. Others have  
493 suggested that site-specific hydrological conditions have important controls on the ultimate sustainability of high  
494 Arctic waters, including substrate characteristics, snowpack accumulation, and connection to water sources  
495 (Abnizova and Young, 2010). In the Lake Hazen watershed, expected increases in nearby coastal evaporation and  
496 landward precipitation (Bintanja and Selten, 2014) may deliver larger snowpacks, recharges of subsurface ice or  
497 water storage, and increases in summertime runoff to aquatic systems. Increased temperatures, however, should also  
498 work to sustain wet areas in the watershed. Increased glacial melt would continue to deliver more water to Lake  
499 Hazen and flood Shoreline Lakes for longer periods. Higher temperatures should also improve water delivery to  
500 Meltwater systems and meadow wetlands supplied by thawing subsurface ice. Only shallow Evaporative ponds,  
501 which endure a precarious existence based on net balances in snowmelt and evaporation, have a less certain future.  
502 We suspect that these Evaporative systems may be susceptible to drying over the shorter term as air temperatures  
503 increase, but the weak water storage capacity of well-drained polar semidesert soils continues. Only until long-term  
504 improvements in productivity and organic matter content in soils occurs, would we expect more consistent sources  
505 of runoff to shallow systems. Well-drained polar semideserts, similarly, may also be expected to remain relatively  
506 dry until water holding capacity of the soils improves (Emmerton et al., 2016).

507 With expected sustainability of water delivery to most wet systems in the Lake Hazen watershed over the  
508 longer term, future carbon GHG exchange there and other high Arctic regions, is likely dependant on the trajectory  
509 of landscape change of polar semideserts (Sitch et al., 2007). Low CO<sub>2</sub> and CH<sub>4</sub> exchange in upland systems and  
510 Lake Hazen will likely continue until water and nutrient conditions in polar semidesert soils draining to them  
511 improves over the longer term. Shoreline ponds may be flooded earlier and for longer periods as Lake Hazen  
512 receives increased glacial melt water, possibly amplifying carbon GHG emissions over the short term. However,  
513 supply of decomposable organic carbon may decrease as periods when these systems are in a productive wetland-  
514 state becomes less frequent. Regardless, Shoreline ponds likely have little role in regional carbon GHG exchange  
515 due to minimal abundances. Consequently, changes in the terrestrial ecosystems, over the longer term, should  
516 continue to define the direction and intensity of GHG exchanges in the high Arctic. Meadow wetlands are key high  
517 Arctic regions due to substantial growing season productivity and CO<sub>2</sub> consumption, despite their low abundance.

518 [Notable spatial expansion of these very productive systems, though, is unlikely due to topographical constraints. The](#)  
519 [potential of dry polar semideserts to change, however, is great over the long term \(ACIA, 2004\). As plant growth,](#)  
520 [organic matter production and soil water retention improve as expected in the polar semidesert, its CO<sub>2</sub> sink strength](#)  
521 [during the growing season should also improve. However, this may also work to perturb atmospheric oxygen and](#)  
522 [methane infiltration into polar semidesert soils and perhaps decrease the magnitude of its globally-important](#)  
523 [atmospheric CH<sub>4</sub> sink \(Jorgensen et al., 2015\). Ultimately, terrestrial ecosystems and their future climate-related](#)  
524 [changes, rather than those in lakes and ponds, will likely control future carbon cycling at high Arctic latitudes.](#)

## 525 **References**

- 526 [Abnizova, A., Young, K.L.: Sustainability of High Arctic ponds in a polar desert environment, \*Arctic\*, 67-84, 2010.](#)  
527 Abnizova A., Siemens, J., Langer M., Boike J.: Small ponds with major impact: The relevance of ponds and lakes in  
528 permafrost landscapes to carbon dioxide emissions, *Global Biogeochemical Cycles*, 26, GB2040, 2012.
- 529 Arctic Monitoring and Assessment Program (AMAP) Assessment Report: Arctic Pollution Issues, Arctic  
530 Monitoring and Assessment Programme (AMAP), Oslo, Norway, xii+859 pp, 1998.
- 531 Arctic Climate Impact Assessment (ACIA): Impacts of a Warming Arctic: Arctic Climate Impact Assessment,  
532 Cambridge University Press, Cambridge, UK, 2004.
- 533 Babaluk, J.A., Gantner, N., Michaud, W., Muir, D.C.G., Power, M., Reist, J.D., Sinnatamby, R., Wang, X.:  
534 Chemical Analyses of water from lakes and streams in Quttinirpaaq National park Nunavut 2001-2008,  
535 Canadian Data Report of Fisheries and Aquatic Sciences 1217, Government of Canada Winnipeg, 2009.
- 536 Bastviken, D., Tranvik, L.J., Downing, J.A., Crill, P.M., Enrich-Prast, A.: Freshwater methane emissions offset the  
537 continental carbon sink, *Science*, 331, 50-50, 2011.
- 538 Battin, T.J., Luysaert, S., Kaplan, L.A., Aufdenkampe, A.K., Richter, A., Tranvik, L.J.: The boundless carbon  
539 cycle, *Nature Geoscience*, 2, 598-600, 2009.
- 540 Bintanja, R., Selten, F.M.: Future increases in Arctic precipitation linked to local evaporation and sea-ice retreat,  
541 *Nature*, 509, 479-482, 2014.
- 542 Campbell, I.B., Claridge, G.G.C.: Chapter 8 Soils of cold climate regions In: *Weathering Soils & Paleosols* Martini  
543 IP, Chesworth W (eds). Elsevier, Amsterdam, The Netherlands, 183-224, 1992.
- 544 Cole, J.J., Prairie, Y.T., Caraco, N.F., McDowell, W.H., Tranvik, L.J., Striegl, R.G., Duarte, C.M., Kortelainen, P.,  
545 Downing, J.A., Middelburg, J.J., Melack, J.: Plumbing the global carbon cycle: Integrating inland waters into  
546 the terrestrial carbon budget, *Ecosystems*, 10, 171-184, 2007.
- 547 Edlund, S.A.: *Vegetation in: Resource Description and Analysis –Ellesmere Island National Park Reserve, Natural*  
548 *Resource Conservation Section Prairie and Northern Region Parks Canada Department of Canadian Heritage*  
549 *Winnipeg Canada*, 55 pp, 1994.
- 550 Emmerton, C.A., St. Louis, V.L., Humphreys, E.R., Gamon, J.A., Barker, J.D., Pastorello, G.Z.: Net ecosystem

551 exchange of CO<sub>2</sub> with rapidly changing high Arctic landscapes, *Global Change Biology*, 22, 1185-2000, 2016.

552 Emmerton, C.A., St. Louis, V.L., Lehnherr, I., Humphreys, E.R., Rydz, E., Kosolofski, H.R.: The net exchange of  
553 methane with high Arctic landscapes during the summer growing season, *Biogeosciences*, 11, 3095-3106,  
554 2014.

555 Environment Canada: Canadian National Atmospheric Chemistry greenhouse gases database, Environment Canada  
556 Science and Technology Branch, 2015.

557 Environment Canada, Canadian climate normals 1981-2000. Available from:  
558 [http://climateweathergccca/climate\\_normals/](http://climateweathergccca/climate_normals/), 2016.

559 [Euskirchen, S. E., A. D. McGuire, F. S. Chapin, III: Energy feedbacks of northern high-latitude ecosystems to the](#)  
560 [climate system due to reduced snow cover during 20th century warming, \*Global Change Biology\*, 13, 2425-](#)  
561 [2438, 2007.](#)

562 France, R.L.: The Lake Hazen trough - a late winter oasis in a polar desert, *Biological Conservation*, 63, 149-151,  
563 1993.

564 Froese, D.G., Westgate, J.A., Reyes, A.V., Enkin, R.J., Preece, S.J.: Ancient permafrost and a future warmer Arctic,  
565 *Science*, 321, 1648, 2008.

566 Hamilton, J.D., Kelly, C.A., Rudd, J.W.M., Hesslein, R.H., Roulet, N.T.: Flux to the atmosphere of CH<sub>4</sub> and CO<sub>2</sub>  
567 from wetland ponds on the Hudson-Bay lowlands (hbbs), *Journal of Geophysical Research-Atmospheres*, 99,  
568 1495-1510, 1994.

569 Intergovernmental Panel on Climate Change (IPCC): *Climate Change, The Physical Science Basis Contribution of*  
570 *Working Group I to the Fourth Assessment Report of the IPCC 2007*, Cambridge University Press Cambridge  
571 UK, 2007a.

572 Intergovernmental Panel on Climate Change (IPCC): *Climate Change, Impacts Adaptation and Vulnerability*  
573 *Contribution of Working Group II to the Fourth Assessment Report of the IPCC 2007*, Cambridge University  
574 Press Cambridge UK, 2007b.

575 [Jonsson, A., Karlsson, J., Jansson, M.: Sources of carbon dioxide supersaturation in clearwater and humic lakes in](#)  
576 [northern Sweden, \*Ecosystems\*, 6, 224-235, 2003.](#)

577 Jorgensen, C.J., Lund, K.M.L., Westergaard-Nielsen, A., Elberling, B.: Net regional methane sink in high Arctic  
578 soils of northeast Greenland, *Nature Geoscience*, 8, 20-23, 2015.

579 [Karlsson, J., Byström, P., Ask, J., Ask, P., Persson, L., Jansson, M.: Light limitation of nutrient-poor lake](#)  
580 [ecosystems, \*Nature\*, 460, 506-509, 2009.](#)

581 Karlsson, J., Giesler, R., Persson, J., Lundin, E.: High emission of carbon dioxide and methane during ice thaw in  
582 high latitude lakes, *Geophysical Research Letters*, 40, 1123-1127, 2013.

583 Keatley, B.E., Douglas, M.S.V., Smol, J.P.: Limnological characteristics of a high arctic oasis and comparisons  
584 across northern Ellesmere Island, *Arctic*, 60, 294-308, 2007.

585 Kelly, C.A., Rudd, J.W.M., Bodaly, R.A., Roulet, N.P., St. Louis, V.L., Heyes, A., Moore, T.R., Schiff, S., Aravena,  
586 R., Scott, K.J., Dyck, B., Harris, R., Warner, B., Edwards, G.: Increases in fluxes of greenhouse gases and  
587 methyl mercury following flooding of an experimental reservoir, *Environmental Science & Technology*, 31,

588 1334-1344, 1997.

589 Kelly, C.A., Fee, E., Ramlal, P.S., Rudd, J.W.M., Hesslein, R.H., Anema, C., Schindler, E.U.: Natural variability of  
590 carbon dioxide and net epilimnetic production in the surface waters of boreal lakes of different sizes, *Limnol.*  
591 *Oceanogr.* 46, 1054-1064, 2001.

592 Kling, G.W., Kipphut, G.W., Miller, M.C.: The flux of CO<sub>2</sub> and CH<sub>4</sub> from lakes and rivers in arctic Alaska,  
593 *Hydrobiologia*, 240, 23-36, 1992.

594 Kock, G., Muir, D., Yang, F., Wang, X., Talbot, C., Gantner, N., Moser, D.: Bathymetry and sediment geochemistry  
595 of Lake Hazen (Quttinirpaaq National Park) Ellesmere Island Nunavut, *Arctic*, 65, 56-66, 2012.

596 Lafleur, P.M., Humphreys, E.R., St. Louis, V.L., Myklebust, M.C., Papakyriakou, T., Poissant, L., Barker, J.D.,  
597 Pilote, M., Swystun, K.A.: Variation in peak growing season net ecosystem production across the Canadian  
598 Arctic, *Environ Sci Technol.*, 46, 7971–7977, 2012.

599 Lai, D.Y.F.: Methane dynamics in northern peatlands: A review, *Pedosphere*, 19, 409-421, 2009.

600 Laurion, I., Vincent, W.F., MacIntyre, S., Retamal, L., Dupont, C., Francus, P., Pienitz, R.: Variability in  
601 greenhouse gas emissions from permafrost thaw ponds, *Limnology and Oceanography*, 55, 115-133, 2010.

602 Lehner, B., Doll, P.: Development and validation of a global database of lakes reservoirs and wetlands, *Journal of*  
603 *Hydrology*, 296, 1-22, 2004.

604 Liss, P.S., Slater, P.G.: Flux of gases across air-sea interface, *Nature*, 247, 181-184, 1974.

605 Lloyd, C.R.: The measurement and modelling of the carbon dioxide exchange at a high arctic site in Svalbard,  
606 *Global Change Biology*, 7, 405-426, 2001.

607 Lund, M., Falk, J.M., Friberg, T., Mbufong, H.N., Sigsgaard, C., Soegaard, H., Tamstorf, M.P.: Trends in CO<sub>2</sub>  
608 exchange in a high arctic tundra heath 2000-2010, *Journal of Geophysical Research-Biogeosciences*, 117,  
609 G02001, 2012.

610 Maberly, S.C., Barker, P.A., Stott, A.W., De Ville, M.M.: Catchment productivity controls CO<sub>2</sub> emissions from  
611 lakes, *Nature Climate Change*, 3, 391-394, 2013.

612 MacIntyre, S., Jonsson, A., Jansson, M., Aberg, J., Turney, D.E., Miller, S.D.: Buoyancy flux turbulence and the gas  
613 transfer coefficient in a stratified lake, *Geophysical Research Letters*, 37, L24604, 2010.

614 Mack, M.C., Schuur, E.A.G., Bret-Harte, M.S., Shaver, G.R., Chapin III, F.S.: Ecosystem carbon storage in arctic  
615 tundra reduced by long-term nutrient fertilization, *Nature*, 431, 440-443, 2004.

616 Marcé, R., Obrador, B., Morgui, J.-A., Riera, J.L., Lopez, P., Armengol, J.: Carbonate weathering as a driver of CO<sub>2</sub>  
617 supersaturation in lakes, *Nature Geoscience*, 8, 107-111, 2015.

618 [Markager, S., Vincent, W.F., Tang, E.P.Y.: Carbon fixation by phytoplankton in high Arctic lakes: Implications of](#)  
619 [low temperature for photosynthesis, \*Limnol. Oceanogr.\*, 44, 597-607, 1999.](#)

620 [Meire, L., Søgaard, D.H., Mortensen, J., Meysman, F.J.R., Soetaert, K., Arendt, K.E., Juul-Pedersen, T., Blicher,](#)  
621 [M.E. and Rysgaard, S.: Glacial meltwater and primary production are drivers of strong CO<sub>2</sub> uptake in fjord](#)  
622 [and coastal waters adjacent to the Greenland Ice Sheet, \*Biogeosciences\*, 12, 2347-2363, 2015.](#)

623 [Myneni, R.B., Keeling, C.D., Tucker, C.J., Asrar, G., Nemani, R.R.: Increased plant growth in the norther high](#)  
624 [latitudes from 1981 to 1991, \*Nature\*, 386, 698-702, 1997.](#)

625 Pfeffer, W.T., Harper, J.T., O'Neel, S.: Kinematic constraints on glacier contributions to 21<sup>st</sup>-century sea-level rise,  
626 Science, 321, 1340-1343, 2008.

627 Rautio, M., Dufresne, F., Laurion, I., Bonilla, S., Vincent, W.F., Christoffersen, K.S.: Shallow freshwater  
628 ecosystems of the circumpolar Arctic, *Ecoscience*, 18, 204-222, 2011.

629 Raymond, P.A., Hartmann, J., Lauerwald, R., Sobek, S., McDonald, C., Hoover, M., Butman, D., Striegl, R.,  
630 Mayorga, E., Humborg, C., Kortelainen, P., Duerr, H., Meybeck, M., Ciais, P., Guth, P. Global carbon dioxide  
631 emissions from inland waters, *Nature*, 503, 355-359, 2013.

632 Sachs, T., Giebels, M., Boike, J., Kutzbach, L.: Environmental controls on CH<sub>4</sub> emission from polygonal tundra on  
633 the microsite scale in the Lena river delta Siberia, *Global Change Biology*, 16, 3096-3110, 2010.

634 [Sitch, S., McGuire, A.D., Kimball, J., Gedney, N., Gamon, J., Engstrom, R., Wolf, A., Zhuang, Q., Clein, J.,  
635 McDonald, K.C.: Assessing the carbon balance of circumpolar Arctic tundra using remote sensing and process  
636 modeling, \*Ecological Applications\*, 17, 213-234, 2007.](#)

637 Smith, L.C., Sheng, Y., MacDonald, G.M., Hinzman, L.D.: Disappearing Arctic lakes, *Science*, 308, 1429, 2008.

638 Smol, J.P., Wolfe, A.P., Birks, H.J.B., Douglas, M.S.V., Jones, V.J., Korhola, A., Pienitz, R., Ruhland, K., Sorvari,  
639 S., Antoniades, D., Brooks, S.J., Fallu, M.A., Hughes, M., Keatley, B.E., Laing, T.E., Michelutti, N.,  
640 Nazarova, L., Nyman, M., Paterson, A.M., Perren, B., Quinlan, R., Rautio, M., Saulnier-Talbot, E., Siitonen,  
641 S., Solovieva, N., Weckstrom, J.: Climate-driven regime shifts in the biological communities of arctic lakes,  
642 *Proceedings of the National Academy of Sciences of the United States of America*, 102, 4397-4402, 2005.

643 Smol, J.P., Douglas, M.S.V.: Crossing the final ecological threshold in high Arctic ponds, *PNAS*, 104, 12395-1239,  
644 2007.

645 Soegaard, H., Nordstroem, C., Friborg, T., Hansen, B.U., Christensen, T.R., Bay, C.: Trace gas exchange in a high-  
646 arctic valley. 3. Integrating and scaling CO<sub>2</sub> fluxes from canopy to landscape using flux data footprint  
647 modeling and remote sensing, *Global Biogeochemical Cycles*, 14, 725-744, 2000.

648 Tagesson, T., Molder, M., Mastepanov, M., Sigsgaard, C., Tamstorf, M.P., Lund, M., Falk, J.M., Lindroth, A.,  
649 Christensen, T.R., Strom, L.: Land-atmosphere exchange of methane from soil thawing to soil freezing in a  
650 high-arctic wet tundra ecosystem, *Global Change Biology*, 18, 1928-1940, 2012.

651 Tank, S.E., Lesack, L.F.W., Hesslein, R.H.: Northern delta lakes as summertime CO<sub>2</sub> absorbers within the arctic  
652 landscape, *Ecosystems*, 12, 144-157, 2009.

653 Tarnocai, C., Canadell, J.G., Schuur, E.A.G., Kuhry, P., Mazhitova, G., Zimov, S.: Soil organic carbon pools in the  
654 northern circumpolar permafrost region, *Global Biogeochemical Cycles*, 23, GB2023, 2009.

655 Tranvik, L.J., Downing, J.A., Cotner, J.B., Loiselle, S.A., Striegl, R.G., Ballatore, T.J., Dillon, P., Finlay, K.,  
656 Fortino, K., Knoll, L.B., Kortelainen, P.L., Kutser, T., Larsen, S., Laurion, I., Leech, D.M., McCallister, S.L.,  
657 McKnight, D.M., Melack, J.M., Overholt, E., Porter, J.A., Prairie, Y., Renwick, W.H., Roland, F., Sherman,  
658 B.S., Schindler, D.W., Sobek, S., Tremblay, A., Vanni, M.J., Verschoor, A.M., von Wachenfeldt, E.,  
659 Weyhenmeyer, G.A.: Lakes and reservoirs as regulators of carbon cycling and climate, *Limnology and  
660 Oceanography*, 54, 2298-2314, 2009.

661 Trettin, H.P.: *Geology In: Resource description and analysis - Ellesmere Island National Park Reserve*, Department

662 of Canadian Heritage Winnipeg Canada, p. 1-78, 1994.

663 Walter, K.M., Zimov, S.A., Chanton, J.P., Verbyla, D., Chapin, F.S. III: Methane bubbling from Siberian thaw lakes  
664 as a positive feedback to climate warming, *Nature*, 443, 71-75, 2006.

665 Walker, M.D., Wahren, C.H., Hollister, R.D., Henry, G.H.R., Ahlquist, L.E., Alatalo, J.M., Bret-Harte, M.S., Calef,  
666 M.P., Callaghan, T.V., Carroll, A.B., Epstein, H.E., Jonsdottir, I.S., Klein, J.A., Magnusson, B., Molau, U.,  
667 Oberbauer, S.F., Rewa, S.P., Robinson, C.H., Shaver, G.R., Suding, K.N., Thompson, C.C., Tolvanen, A.,  
668 Totland, O., Turner, P.L., Tweedie, C.E., Webber, P.J., Wookey, P.A.: Plant community responses to  
669 experimental warming across the tundra biome, *PNAS*, 103, 1342-1346, 2006.

670 Water Survey of Canada (WSC): Real time hydrometric data, Available from:  
671 [http://www.waterofficecgcca/index\\_ehtml](http://www.waterofficecgcca/index_ehtml), 2015.

672 [Wetzel, R. G: Limnology: lake and river ecosystems. Gulf Professional Publishing, 2001.](#)

673 [Woo, M-K, Guan, X.J.: Hydrological connectivity and seasonal storage change of tundra ponds in a polar oasis](#)  
674 [environment, Canadian High Arctic, Permafrost and Periglacial Processes, 17, 309-323, 2006.](#)

675

## 676 Acknowledgements

677 This work was supported by the Natural Sciences and Engineering Research Council (Discovery Grants  
678 Program, Northern Research Supplement, Canada Graduate Scholarship), Natural Resources Canada (Polar  
679 Continental Shelf Project), the Canadian International Polar Year (Climate Change Impacts on Canadian Arctic  
680 Tundra project; Government of Canada), the Canadian Circumpolar Institute (Circumpolar Boreal Alberta Research  
681 grant), the Association of Canadian Universities for Northern Studies (ACUNS), ArcticNet, and Indigenous and  
682 Northern Affairs Canada (INAC; Northern Scientific Training Program). We are grateful for the logistical, technical  
683 and field support of Parks Canada at Quttinirpaaq National Park and the Polar Continental Shelf Project–Resolute  
684 Bay. We thank Dr. Sherry Schiff and Dr. Jason Venkiteswaran for providing isotopic analyses. We are also thankful  
685 of the tremendous support provided by the University of Alberta Biogeochemical Analytical Service Laboratory,  
686 Claude Labine and Campbell Scientific Canada Corp., Elizabeth (Ela) Rydz, Hayley Kosolofski, Patrick Buat, Dr.  
687 Micheline Manseau and Dr. Raymond Hesslein.

688 **Tables**689 **Table 1 Morphometry and hydrology of ponds and lakes sampled for dissolved greenhouse gases concentrations and**  
690 **general chemistry in the Lake Hazen (LH) watershed during the growing seasons (June-August) of 2005, and 2007-2012.**

| Lake or Pond (location) |                   | Surface area (ha) | Mean depth (m)  | Max. depth (m)   | Elevation (m asl) | Primary water sources |
|-------------------------|-------------------|-------------------|-----------------|------------------|-------------------|-----------------------|
| Pond 01                 | (N81.822 W71.352) | 0.1-0.7           | 0.2-0.6         | 0.5-1.3          | 166               | LH, snowmelt          |
| Pond 02                 | (N81.811W71.453)  | 0.2-3.4           | 0.1-0.4         | 0.3-1.2          | 165               | LH, snowmelt          |
| Pond 03                 | (N81.829 W71.462) | 0.04              | 0.3             | 0.8              | 338               | Snowmelt              |
| Pond 07                 | (N81.835 W71.305) | 0.4               | 0.1             | 0.3              | 184               | Snowmelt              |
| Pond 10                 | (N81.838 W71.343) | 2.5               | 1.1             | 2.4              | 222               | Snowmelt              |
| Pond 11                 | (N81.832W71.466)  | 0.2               | 1.1             | 2.5              | 291               | Snowmelt, ground ice  |
| Pond 12                 | (N81.831W71.529)  | 0.2               | 0.8             | 1.9              | 370               | Snowmelt              |
| Pond 16                 | (N81.850W71.392)  | 0.7               | 1.1             | 2.1              | 434               | Snowmelt, ground ice  |
| Skeleton L.             | (N81.829W71.480)  | 1.9               | 1.9             | 4.7              | 299               | Snowmelt, ground ice  |
| LH-shore                | (N81.821 W71.352) | 54,200            | 95 <sup>a</sup> | 267 <sup>a</sup> | 158               | Glacial, snowmelt     |

<sup>a</sup>Kock et al., 2012

691

692

693

694

695

696 **Table 2 Number of samples collected for both dissolved greenhouse gases and general chemical analyses within**  
697 **freshwater systems of the Lake Hazen watershed during the growing seasons (June-August) of 2005, and 2007 to 2012. All**  
698 **calculated gas fluxes were based on samples collected for concentration analyses.**

| Water body                                               | 2005 | 2007 | 2008  | 2009  | 2010  | 2011 | 2012 |
|----------------------------------------------------------|------|------|-------|-------|-------|------|------|
| <b><u>CO<sub>2</sub>, CH<sub>4</sub> (chemistry)</u></b> |      |      |       |       |       |      |      |
| Pond 01                                                  | 16   | 25   | 30(5) | 24(5) | 35(5) | 3    | -    |
| Pond 02                                                  | 16   | 1    | 5(5)  | -     | 2(2)  | 3    | -    |
| Pond 03                                                  | 1    | 1    | 1     | -     | 1(1)  | 3    | -    |
| Pond 07                                                  | 1    | 1    | 1     | -     | 2(2)  | 3    | -    |
| Pond 10                                                  | 1    | -    | -     | -     | 2(2)  | 3    | -    |
| Pond 11                                                  | 1    | -    | -     | -     | 2(2)  | 6    | 3    |
| Pond 12                                                  | 1    | 1    | 1     | -     | 2(2)  | -    | -    |
| Pond 16                                                  | -    | -    | -     | -     | 2(2)  | 3    | -    |
| Skeleton Lake                                            | -    | 19   | 16(5) | 23(5) | 29(4) | 6    | 3    |
| Lake Hazen shoreline                                     | 17   | 27   | 30(6) | 24(5) | 29(4) | 3    | -    |

699 **Table 3** Mean ( $\pm 1SD$ ) water temperature and general chemistry of different freshwater types, **and other selected locations and periods** in the Lake Hazen watershed  
 700 during the growing seasons (**June-August**) of 2005, 2007-2012. All measurements are in  $\mu\text{mol L}^{-1}$  except for **water temperature** ( $^{\circ}\text{C}$ ), **total dissolved solids** ( $\text{mg L}^{-1}$ ) and  
 701 **chlorophyll-a** ( $\mu\text{g L}^{-1}$ ).

|                             | <u>W<sub>T</sub></u> | <u>TDS</u>            | <u>PC</u>          | <u>DIC</u>              | <u>DOC</u>                | <u>NO<sub>3</sub><sup>-</sup>+NO<sub>2</sub><sup>-</sup></u> | <u>NH<sub>4</sub><sup>+</sup></u> | <u>TDN</u>           | <u>TDP</u>            | <u>Fe</u>             | <u>SO<sub>4</sub><sup>2-</sup></u> | <u>Chl-a</u>          |
|-----------------------------|----------------------|-----------------------|--------------------|-------------------------|---------------------------|--------------------------------------------------------------|-----------------------------------|----------------------|-----------------------|-----------------------|------------------------------------|-----------------------|
| <b>Evaporative</b>          |                      |                       |                    |                         |                           |                                                              |                                   |                      |                       |                       |                                    |                       |
| <u>Pond 03</u>              | <u>8</u>             | <u>485</u>            | <u>44</u>          | <u>2,308</u>            | <u>1,848</u>              | <u>0.01</u>                                                  | <u>0.1</u>                        | <u>113</u>           | <u>0.4</u>            | <u>0.9</u>            | <u>1,720</u>                       | <u>0.9</u>            |
| <u>Pond 07</u>              | <u>12±6</u>          | <u>1,336±32</u>       | <u>62±6</u>        | <u>2,574±93</u>         | <u>3,859±88</u>           | <u>0.01±0.00</u>                                             | <u>1.1±1.0</u>                    | <u>125±40</u>        | <u>0.4±0.0</u>        | <u>3.2±1.0</u>        | <u>6,628±186</u>                   | <u>0.5±0.2</u>        |
| <u>Pond 10</u>              | <u>12±6</u>          | <u>934±32</u>         | <u>47±15</u>       | <u>2,248±4</u>          | <u>1,982±106</u>          | <u>0.01±0.00</u>                                             | <u>0.5±0.6</u>                    | <u>121±35</u>        | <u>0.2±0.0</u>        | <u>0.0±0.0</u>        | <u>4,676±113</u>                   | <u>2.4±0.8</u>        |
| <u>Pond 12</u>              | <u>11±3</u>          | <u>1,060±15</u>       | <u>41±3</u>        | <u>1,450±97</u>         | <u>1,544±29</u>           | <u>0.03±0.02</u>                                             | <u>0.1±0.1</u>                    | <u>86±1</u>          | <u>0.3±0.0</u>        | <u>0.2±0.1</u>        | <u>6,454±118</u>                   | <u>1.1±0.1</u>        |
| <b><u>Mean±SD</u></b>       | <b><u>10±2</u></b>   | <b><u>953±355</u></b> | <b><u>49±9</u></b> | <b><u>2,145±484</u></b> | <b><u>2,308±1,050</u></b> | <b><u>0.01±0.01</u></b>                                      | <b><u>0.5±0.5</u></b>             | <b><u>111±18</u></b> | <b><u>0.3±0.1</u></b> | <b><u>1.1±1.5</u></b> | <b><u>4,870±2278</u></b>           | <b><u>1.2±0.8</u></b> |
| <b>Meltwater</b>            |                      |                       |                    |                         |                           |                                                              |                                   |                      |                       |                       |                                    |                       |
| <u>Pond 11</u>              | <u>12±2</u>          | <u>451±24</u>         | <u>29±11</u>       | <u>1,453±30</u>         | <u>383±12</u>             | <u>0.03±0.02</u>                                             | <u>0.3±0.4</u>                    | <u>20±2</u>          | <u>0.2±0.0</u>        | <u>0.0±0.0</u>        | <u>2,232±52</u>                    | <u>0.6±0.2</u>        |
| <u>Pond 16</u>              | <u>11±5</u>          | <u>328±12</u>         | <u>18±3</u>        | <u>939±4</u>            | <u>554±18</u>             | <u>0.01±0.00</u>                                             | <u>0.3±0.3</u>                    | <u>24±0</u>          | <u>0.2±0.0</u>        | <u>0.1±0.1</u>        | <u>1,885±49</u>                    | <u>0.3±0.1</u>        |
| <u>Skeleton L.</u>          | <u>11±4</u>          | <u>317±115</u>        | <u>23±9</u>        | <u>1,533±241</u>        | <u>447±63</u>             | <u>0.02±0.01</u>                                             | <u>2.4±2.3</u>                    | <u>22±2</u>          | <u>0.2±0.0</u>        | <u>0.0±0.0</u>        | <u>1,669±392</u>                   | <u>0.5±0.4</u>        |
| <b><u>Mean±SD</u></b>       | <b><u>11±0</u></b>   | <b><u>365±75</u></b>  | <b><u>24±6</u></b> | <b><u>1,308±323</u></b> | <b><u>461±86</u></b>      | <b><u>0.02±0.01</u></b>                                      | <b><u>1.0±1.2</u></b>             | <b><u>22±2</u></b>   | <b><u>0.2±0.0</u></b> | <b><u>0.1±0.0</u></b> | <b><u>1,928±284</u></b>            | <b><u>0.5±0.1</u></b> |
| <u>Melt. streams</u>        | <u>3</u>             | <u>653</u>            | <u>-</u>           | <u>769</u>              | <u>67</u>                 | <u>7.70</u>                                                  | <u>0.1</u>                        | <u>35</u>            | <u>0.0</u>            | <u>0.6</u>            | <u>3,318</u>                       | <u>2.1</u>            |
| <b>Shoreline</b>            |                      |                       |                    |                         |                           |                                                              |                                   |                      |                       |                       |                                    |                       |
| <u>Pond 01</u>              | <u>12±3</u>          | <u>192±31</u>         | <u>34±17</u>       | <u>1,848±443</u>        | <u>409±124</u>            | <u>0.11±0.18</u>                                             | <u>2.8±2.8</u>                    | <u>24±11</u>         | <u>0.2±0.1</u>        | <u>2.1±1.6</u>        | <u>407±129</u>                     | <u>0.5±1.1</u>        |
| <u>Pond 02</u>              | <u>10±2</u>          | <u>131±26</u>         | <u>27±15</u>       | <u>1,356±198</u>        | <u>103±25</u>             | <u>0.11±0.19</u>                                             | <u>0.5±0.7</u>                    | <u>6±1</u>           | <u>0.1±0.0</u>        | <u>0.3±0.3</u>        | <u>273±107</u>                     | <u>0.2±0.1</u>        |
| <b><u>Mean±SD</u></b>       | <b><u>11±2</u></b>   | <b><u>162±43</u></b>  | <b><u>31±5</u></b> | <b><u>1,602±348</u></b> | <b><u>256±216</u></b>     | <b><u>0.11±0.00</u></b>                                      | <b><u>1.6±1.6</u></b>             | <b><u>15±13</u></b>  | <b><u>0.2±0.1</u></b> | <b><u>1.2±1.3</u></b> | <b><u>340±95</u></b>               | <b><u>0.4±0.3</u></b> |
| <u>Pre-flood</u>            | <u>14±3</u>          | <u>216±56</u>         | <u>34±4</u>        | <u>1,740±243</u>        | <u>497±115</u>            | <u>0.01±0.00</u>                                             | <u>2.2±2.8</u>                    | <u>27±4</u>          | <u>0.3±0.0</u>        | <u>1.7±0.7</u>        | <u>608±231</u>                     | <u>0.4±0.2</u>        |
| <u>Post-flood</u>           | <u>11±2</u>          | <u>164±40</u>         | <u>32±18</u>       | <u>1,681±470</u>        | <u>270±172</u>            | <u>0.13±0.19</u>                                             | <u>2.0±2.5</u>                    | <u>16±13</u>         | <u>0.2±0.1</u>        | <u>1.5±1.7</u>        | <u>311±102</u>                     | <u>0.5±1.0</u>        |
| <b>Lake Hazen shoreline</b> |                      |                       |                    |                         |                           |                                                              |                                   |                      |                       |                       |                                    |                       |
| <b><u>Mean±SD</u></b>       | <b><u>5±3</u></b>    | <b><u>59±68</u></b>   | <b><u>10±5</u></b> | <b><u>524±301</u></b>   | <b><u>51±123</u></b>      | <b><u>0.24±0.18</u></b>                                      | <b><u>1.8±2.3</u></b>             | <b><u>2±1</u></b>    | <b><u>0.1±0.0</u></b> | <b><u>0.0±0.0</u></b> | <b><u>69±42</u></b>                | <b><u>0.1±0.1</u></b> |

702  
 703 *W<sub>T</sub>*: water temperature; *TDS*: total dissolved solids; *PC*: particulate carbon; *DIC*: dissolved inorganic carbon; *DOC*: dissolved organic carbon; *NO<sub>3</sub><sup>-</sup>+NO<sub>2</sub><sup>-</sup>*: dissolved nitrate +  
 704 nitrite; *NH<sub>4</sub><sup>+</sup>*: dissolved ammonium; *TDN*: total dissolved nitrogen; *TDP*: total dissolved phosphorus; *Fe*: dissolved iron; *SO<sub>4</sub><sup>2-</sup>*: dissolved sulfate; *chl-a*: chlorophyll-a



705 **Table 4 Comparison of the daily net exchange of carbon dioxide (CO<sub>2</sub>) and methane (CH<sub>4</sub>) between high Arctic terrestrial**  
 706 **and freshwater ecosystems and the atmosphere in the Lake Hazen watershed during the growing seasons (June-August)**  
 707 **of 2005 and 2007-2012. Positive values represent net emission of a gas to the atmosphere. Underlined values denote**  
 708 **statistical differences of daily fluxes from other ecosystem types for each gas (linear mixed model;  $\alpha=0.05$ ; see Methods).**  
 709 **The total and percent growing season exchange of each gas and ecosystem is also shown, as is the surface area of each**  
 710 **ecosystem.**

| Ecosystem                             | CO <sub>2</sub> flux                                   |                                              |            | CH <sub>4</sub> flux                                   |                                              |            | Area            |            |
|---------------------------------------|--------------------------------------------------------|----------------------------------------------|------------|--------------------------------------------------------|----------------------------------------------|------------|-----------------|------------|
|                                       | g C-CO <sub>2</sub><br>m <sup>-2</sup> d <sup>-1</sup> | Mg C-CO <sub>2</sub><br>season <sup>-1</sup> | %          | g C-CH <sub>4</sub><br>m <sup>-2</sup> d <sup>-1</sup> | Mg C-CH <sub>4</sub><br>season <sup>-1</sup> | %          | km <sup>2</sup> | %          |
| <b><u>Aquatic</u></b>                 |                                                        |                                              |            |                                                        |                                              |            |                 |            |
| Upland                                | +0.045±0.180                                           | +598                                         | 4          | +0.001±0.001                                           | +11                                          | 2          | 144             | 2          |
| Shoreline                             | +0.031±0.218                                           | +2                                           | 0          | <u>+0.008±0.001</u>                                    | +0                                           | 0          | 1               | 0          |
| Lake Hazen                            | -0.014±0.269                                           | -721                                         | 5          | +0.000±0.002                                           | +6                                           | 1          | 542             | 7          |
| <b><u>Terrestrial<sup>a</sup></u></b> |                                                        |                                              |            |                                                        |                                              |            |                 |            |
| P. semidesert                         | +0.004±0.223                                           | +1,253                                       | 9          | -0.001±0.003                                           | -412                                         | 94         | 3,819           | 51         |
| M. wetland                            | <u>-0.955±0.291</u>                                    | -11,368                                      | 82         | +0.001±0.002                                           | +10                                          | 2          | 129             | 2          |
| Glacial ice                           | n/a                                                    | n/a                                          | n/a        | n/a                                                    | n/a                                          | n/a        | 2,809           | 38         |
| <b>Totals</b>                         | <b>-</b>                                               | <b>-10,236</b>                               | <b>100</b> | <b>-</b>                                               | <b>-385</b>                                  | <b>100</b> | <b>7,443</b>    | <b>100</b> |

711  
 712 <sup>a</sup>from Emmerton et al. 2014, 2016

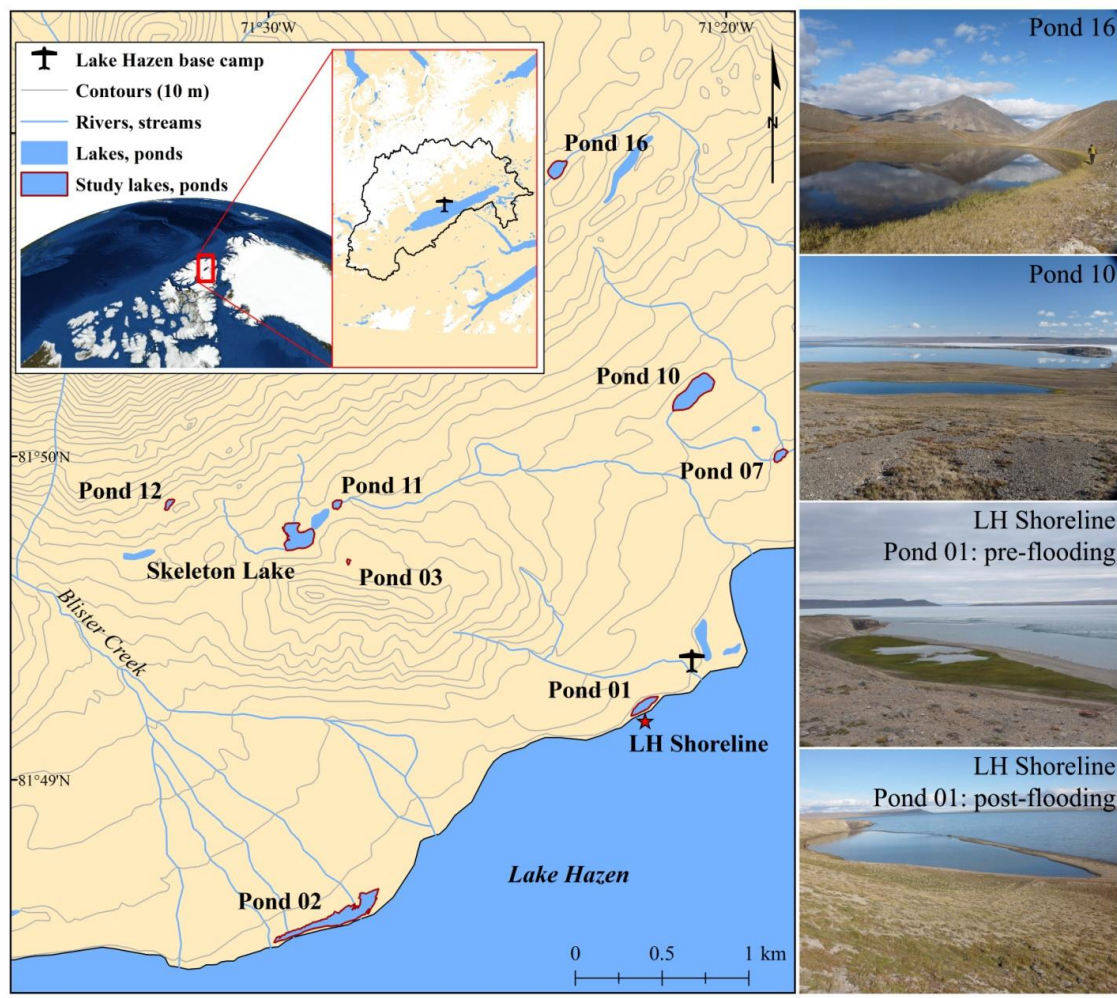

714

715

716 Figure 1 Map of the Lake Hazen base camp in Quttinirpaaq National Park, Nunavut, Canada. Ponds and lakes  
 717 investigated in this study are indicated on the map and selected sites are shown in photographs. Shown inset are the  
 718 general locators of the Lake Hazen watershed.

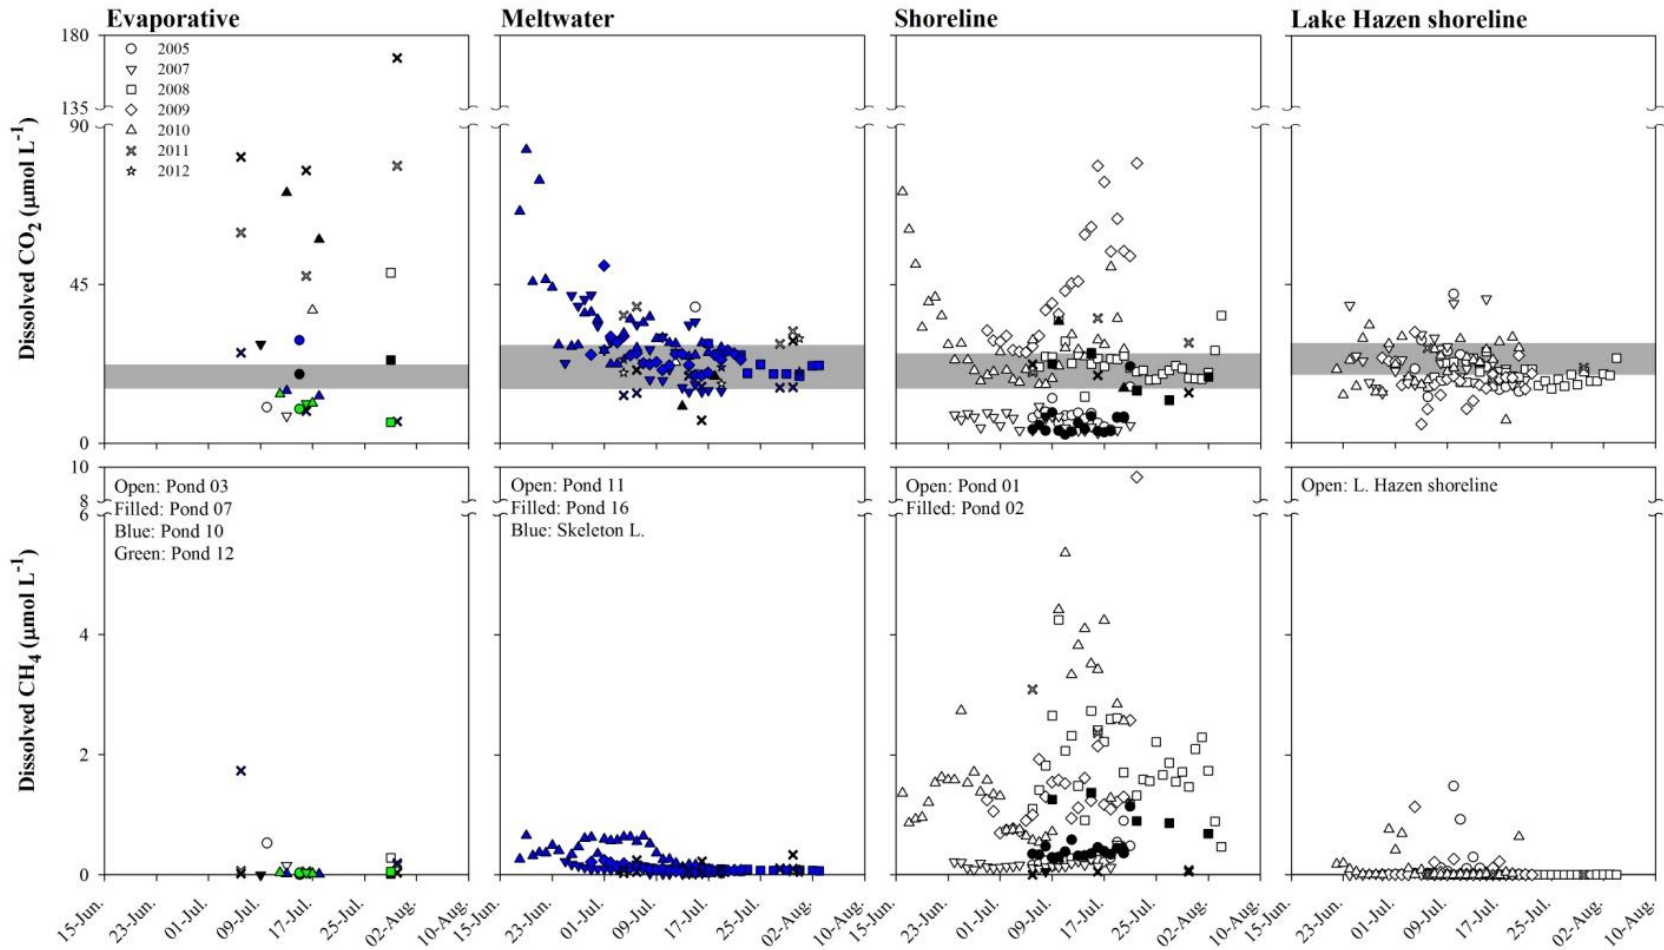

720

721 **Figure 2** Dissolved carbon dioxide (CO<sub>2</sub>) and methane (CH<sub>4</sub>) concentrations during the 2005, and 2007-2012 growing seasons (June-August) from different types of high  
 722 Arctic freshwater systems in the Lake Hazen watershed. Inset text shows site names within each freshwater type. Grey areas indicate the range of atmospheric  
 723 equilibrium concentrations CO<sub>2</sub> and CH<sub>4</sub> during the sampling period.

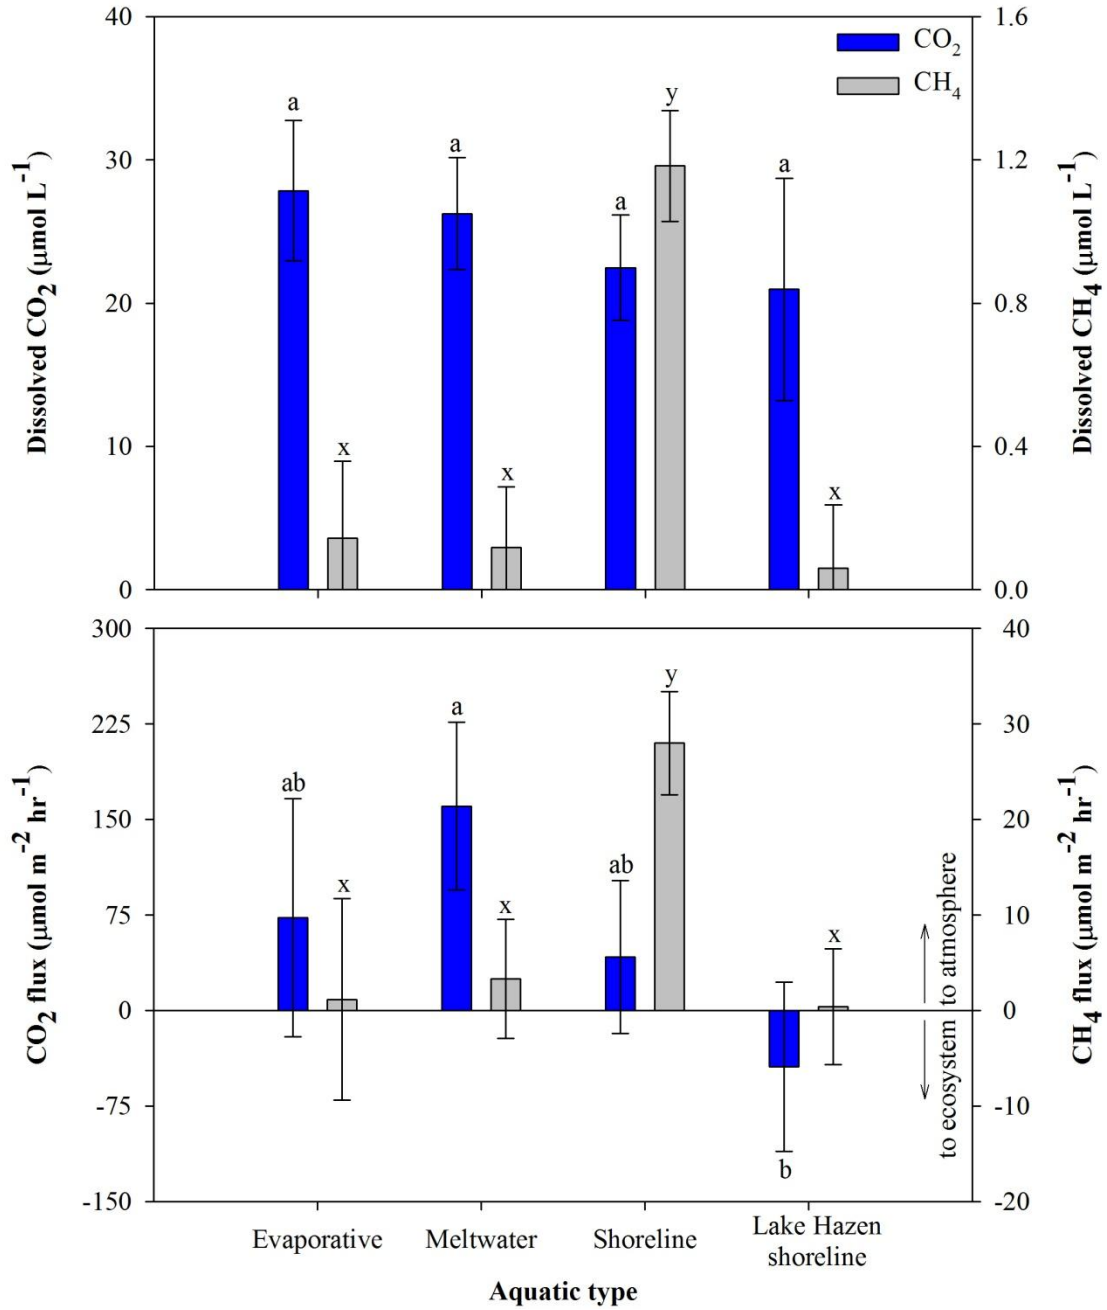

**Figure 3** Mean ( $\pm$ SE) dissolved carbon dioxide (CO<sub>2</sub>) and methane (CH<sub>4</sub>) concentrations and fluxes during the 2005, and 2007-2012 growing seasons (**June-August**) from four different freshwater types in the Lake Hazen watershed. Letters denote statistical differences between ecosystem types for each gas (linear mixed model;  $\alpha=0.05$ ; see **Methods**).

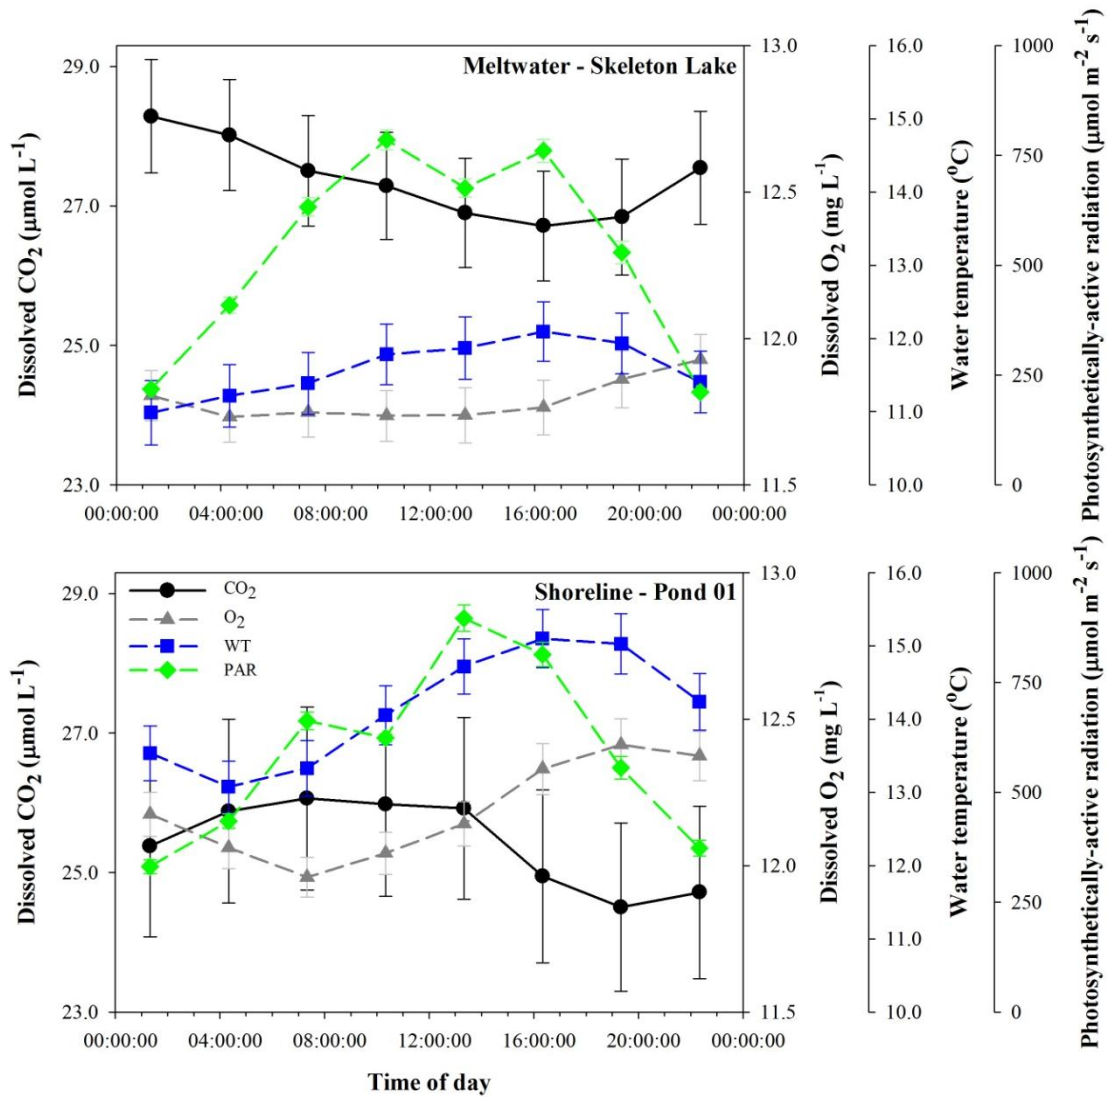

Figure 4 Three-hour diel dissolved carbon dioxide (CO<sub>2</sub>) concentration, oxygen (O<sub>2</sub>) concentration, water temperature and photosynthetically-active radiation (PAR) data measured by automated systems deployed at the shorelines of Skeleton Lake (2008-10) and Pond 01 (2008-10) during the high Arctic growing season (June-August) in the Lake Hazen watershed.
